# Supplementary material
Source: MDPI journal article supplement (https://www.mdpi.com/2306-5338/5/3/51)
Supplement: s1 [file s1]

## Sheet: Sheet1
	Geoscience Support Services (1999)	U.S. Geological Survey (2000)	Lawrence Livermore National Laboratory (2000)	CH2M Hill (2011)	Johnson Wright Inc. (2012)
High	37000	11807	29185
Low	14800	2547	7864
Median			16214	32447	14000
		High	Low	Close
	Geoscience Support Services (1999)	37000	14800
	U.S. Geological Survey (1999)	2547	11807
	Lawrence Livermore National Laboratory (2000)	7864	29185	16214
	CH2M Hill (2012)			32447
	Johnson Wright Inc. (2012)			14000

## Sheet: Time Series
	Baker	Mid-Hills	Mitchell Caverns	Mountain Pass	Needles	Yucca Grove
1931-01-01
1931-02-01
1931-03-01
1931-04-01
1931-05-01
1931-06-01
1931-07-01
1931-08-01
1931-09-01						0
1931-10-01						0
1931-11-01						0.11
1931-12-01						1.8
1932-01-01						0.67
1932-02-01						0.78
1932-03-01						0
1932-04-01						0
1932-05-01						0
1932-06-01						0.16
1932-07-01						0.03
1932-08-01						0
1932-09-01						0.6
1932-10-01						0.3
1932-11-01						0
1932-12-01						1.49
1933-01-01						0
1933-02-01						0
1933-03-01						0
1933-04-01						0
1933-05-01						0
1933-06-01						0.09
1933-07-01						0.2
1933-08-01						0.18
1933-09-01						0
1933-10-01						0.35
1933-11-01						0.02
1933-12-01						0.9
1934-01-01						0
1934-02-01						0.23
1934-03-01						0
1934-04-01						0
1934-05-01						0
1934-06-01						0
1934-07-01						0.7
1934-08-01						0.6
1934-09-01						0
1934-10-01						0.65
1934-11-01						0.65
1934-12-01						1.1
1935-01-01						1
1935-02-01						2.09
1935-03-01						1
1935-04-01						0.45
1935-05-01						0.13
1935-06-01						0
1935-07-01						0.05
1935-08-01
1935-09-01						0
1935-10-01						0
1935-11-01						0
1935-12-01						0.65
1936-01-01						0
1936-02-01						3.02
1936-03-01						0.61
1936-04-01						0.27
1936-05-01						0
1936-06-01						0
1936-07-01
1936-08-01						0.45
1936-09-01						0
1936-10-01						0.15
1936-11-01						0
1936-12-01						4.68
1937-01-01						2.76
1937-02-01						0.55
1937-03-01						0.72
1937-04-01
1937-05-01
1937-06-01
1937-07-01
1937-08-01
1937-09-01
1937-10-01						0
1937-11-01						0
1937-12-01						1.05
1938-01-01						0.45
1938-02-01						1.51
1938-03-01						3.75
1938-04-01						0.2
1938-05-01						0.45
1938-06-01						1.1
1938-07-01						0.07
1938-08-01						0.29
1938-09-01						1.18
1938-10-01						0.55
1938-11-01						0
1938-12-01						2.15
1939-01-01						1.93
1939-02-01						0.56
1939-03-01						1.25
1939-04-01						1.06
1939-05-01						0.01
1939-06-01						0
1939-07-01						0.15
1939-08-01						1.57
1939-09-01						2.22
1939-10-01						0
1939-11-01						1.03
1939-12-01						0.3
1940-01-01						1.51
1940-02-01						1.96
1940-03-01					0.28	0.45
1940-04-01					0.1	1.65
1940-05-01					0	0.06
1940-06-01					0.05	0
1940-07-01					0	0
1940-08-01					0	0
1940-09-01					0.99	1.68
1940-10-01					0.19	0.22
1940-11-01					0.22	0.2
1940-12-01					2.94	1.85
1941-01-01					0.84	1.1
1941-02-01					0.39	1.63
1941-03-01					2.65	2.88
1941-04-01					2.12	2.33
1941-05-01					0	0
1941-06-01					0	0
1941-07-01					0.06
1941-08-01					2.18	2.99
1941-09-01					0.05	0
1941-10-01					0.55	1.45
1941-11-01					0.67	0.51
1941-12-01					1.45
1942-01-01					0.18
1942-02-01					0
1942-03-01					0.27
1942-04-01					0.17
1942-05-01					0
1942-06-01					0
1942-07-01					0
1942-08-01					1.23
1942-09-01					0
1942-10-01					0.17
1942-11-01					0.03
1942-12-01					0
1943-01-01					1.95
1943-02-01					0.03	1.15
1943-03-01					0.4	1.03
1943-04-01					0.38	0.73
1943-05-01					0
1943-06-01					0
1943-07-01					0.11
1943-08-01					0.83
1943-09-01					0.65
1943-10-01					0.16
1943-11-01					0	0
1943-12-01					0.37	1.56
1944-01-01					0	0.55
1944-02-01					1.78	1.66
1944-03-01					0.23	0.2
1944-04-01					0.05	0.12
1944-05-01					0	0.32
1944-06-01					0	0
1944-07-01					0	0
1944-08-01					0	0
1944-09-01					0	0
1944-10-01					0.14	0
1944-11-01					0.87	2.9
1944-12-01					0.48	0.33
1945-01-01					0.18	0.37
1945-02-01					0.75	1.52
1945-03-01					0.9	1.95
1945-04-01					0	0.21
1945-05-01					0	0
1945-06-01					0	0
1945-07-01					0	0.38
1945-08-01					2.41	3.57
1945-09-01					0.12	0.09
1945-10-01					0.9	1.62
1945-11-01					0	0
1945-12-01					1.03	1.29
1946-01-01					0.19	0.22
1946-02-01					0.01	0.49
1946-03-01					0	0.58
1946-04-01					0.01	0.74
1946-05-01					0	0
1946-06-01					0	0
1946-07-01					1.14	1.22
1946-08-01					0.17	0.15
1946-09-01					1.05	0.79
1946-10-01					0.59	1.2
1946-11-01					1.21	1.85
1946-12-01					0.27	1.03
1947-01-01					0	0.06
1947-02-01					0	0.06
1947-03-01					0	0.23
1947-04-01					0	-----
1947-05-01					0.17	0.22
1947-06-01					0	0.07
1947-07-01					0	0.08
1947-08-01					0.72	0
1947-09-01					0	0
1947-10-01					0.66	1.22
1947-11-01					0.03	0
1947-12-01					0.79	2.33
1948-01-01					0	0
1948-02-01					0.12	0.47
1948-03-01					0.05	0.62
1948-04-01					0	0.11
1948-05-01					0	0
1948-06-01					0	0
1948-07-01					0.1	0.26
1948-08-01					0.08	0.47
1948-09-01					0.05	0
1948-10-01					0.41	0.35
1948-11-01					0	0
1948-12-01					0.72	1.13
1949-01-01					4.19	1.76
1949-02-01					0.1	1.03
1949-03-01					0	0.54
1949-04-01					0.01	0.12
1949-05-01					0.01	0.23
1949-06-01					0	0.03
1949-07-01					0.02	0
1949-08-01					0.19	0.3
1949-09-01					0.11	0
1949-10-01					0.08	0.22
1949-11-01					0.15	0.69
1949-12-01					0.32	1.31
1950-01-01					0.04	0.25
1950-02-01					0.01	0.38
1950-03-01					0.3	0.44
1950-04-01					0	0.45
1950-05-01					0	0
1950-06-01					0	0
1950-07-01					0.4	1.25
1950-08-01					0	0
1950-09-01					0.48	0.59
1950-10-01					0	0
1950-11-01					0.03	0.18
1950-12-01					0	0
1951-01-01					0.38	1.68
1951-02-01					0	0.06
1951-03-01					0	0.35
1951-04-01					0.32	0.91
1951-05-01					0.31	0.64
1951-06-01					0	0
1951-07-01					0.21	0.78
1951-08-01					4.2	0.34
1951-09-01					0.23	0.81
1951-10-01					0.49	0.41
1951-11-01					0.47	0.12
1951-12-01					0.75	2.94
1952-01-01					0.58	1.93
1952-02-01					0.07	0.06
1952-03-01					1.02	3.27
1952-04-01					1.07	1.34
1952-05-01					0	0
1952-06-01					0.09	0
1952-07-01					0.97	0.27
1952-08-01					0.18	0
1952-09-01					0.45	1.62
1952-10-01					0	0
1952-11-01					0.5	1.08
1952-12-01					0.89	1.74
1953-01-01					0	0.15
1953-02-01					0.53	0.04
1953-03-01					0.18	0.1
1953-04-01					0.03	0.62
1953-05-01					0	0.16
1953-06-01					0	0
1953-07-01					1.4	0
1953-08-01					0.39	0.61
1953-09-01					0	0
1953-10-01					0	0.24
1953-11-01					0.03	0.11
1953-12-01					0	0.09
1954-01-01					1.12	1.27
1954-02-01					0.05	0.71
1954-03-01					1.69	1.97
1954-04-01					0	0
1954-05-01					0	0
1954-06-01					0	0
1954-07-01					0.64	1.35
1954-08-01					0.15	0
1954-09-01					0.07	0.15
1954-10-01					0	0.03
1954-11-01					0	0.55
1954-12-01					0.03
1955-01-01					1.92
1955-02-01				0	0
1955-03-01				0	0
1955-04-01				0.2	0.09
1955-05-01				0.56	0
1955-06-01				0.35	0
1955-07-01				3.36	1.19
1955-08-01				4.06	1.58
1955-09-01				0	0
1955-10-01				0	0
1955-11-01				0.62	0.1
1955-12-01				0.16	0
1956-01-01				0.98	0.59
1956-02-01				0	0
1956-03-01				0	0
1956-04-01				0.4	0.02
1956-05-01				0.01	0
1956-06-01				0	0
1956-07-01				1.08	0.81
1956-08-01				0	0.13
1956-09-01				0	0
1956-10-01				0.5	0
1956-11-01				0	0
1956-12-01				0	0
1957-01-01				0.92	0.32
1957-02-01				0.45	0.14
1957-03-01				0.46	0.02
1957-04-01				0.63	0.25
1957-05-01				1.06	0.16
1957-06-01				0.05	0.05
1957-07-01				0.13	0
1957-08-01				1.82	1.08
1957-09-01				0	0
1957-10-01				1.72	1.37
1957-11-01				0.67	0.46
1957-12-01				0.2	0.16
1958-01-01				0.55	0.33
1958-02-01				1.41	1.02
1958-03-01			1.78	1.97	0.81
1958-04-01			1.82	1.87	0.26
1958-05-01			0.58	0.83	0.66
1958-06-01			0	0	0
1958-07-01			0.04	0.15	0
1958-08-01			1.19	1.77	0.8
1958-09-01			1.3	2.6	0.09
1958-10-01			0.8	0.48	0.53
1958-11-01			0.8	1.7	0
1958-12-01			0	0	0
1959-01-01			0.25	0.18	0.2
1959-02-01			1.02	1.35	0.19
1959-03-01			0	0	0
1959-04-01			0	0.07	0.02
1959-05-01			0	0	0
1959-06-01			0	0.02	0.01
1959-07-01			0.48	1.67	0.19
1959-08-01			0.87	0.39	2.09
1959-09-01			0.19	0.23	0.31
1959-10-01			0.71	1.92	1.1
1959-11-01			0.47	0.27	0
1959-12-01			3.57	1.86	2.07
1960-01-01			1.93	0.88	0.54
1960-02-01			0.73	1.27	0.64
1960-03-01			0.28	0.16	0
1960-04-01			0	0.47	0
1960-05-01			0	0	0.03
1960-06-01			0		0
1960-07-01			0.57		0.03
1960-08-01			0		0.04
1960-09-01			0.73		0.69
1960-10-01			0.3	0	0
1960-11-01			1.28	1.4	1.15
1960-12-01			0.75	0.4	0
1961-01-01			0.67	1.15	0.14
1961-02-01			0.15	0.04	0
1961-03-01			1.09	0.52	0.07
1961-04-01			0.82	0.2	0.02
1961-05-01			0	0.03	0.12
1961-06-01			0	0	0
1961-07-01			0.14		0.04
1961-08-01			0.43	0.29	0.55
1961-09-01			1.37	0	0.02
1961-10-01			0.11	0.19	0.4
1961-11-01			0.19	0.34	0.02
1961-12-01			0.79	0.73	0.17
1962-01-01			0.14	0.95	0.01
1962-02-01			1.08	1.33	0.34
1962-03-01			0.57	0.82	0
1962-04-01			0	0	0
1962-05-01			0.64	0.11	0
1962-06-01			0	0.03	0.01
1962-07-01			0.03	0.1	0.17
1962-08-01			0	0	0.15
1962-09-01			0.04		0.03
1962-10-01			0.26		0.16
1962-11-01			0	0	0
1962-12-01			0.29	0.33	0.34
1963-01-01			0.34	0.35	0
1963-02-01			3.36	2.51	0.65
1963-03-01			0.26	0.17	0.04
1963-04-01			0.27	0.2	0.01
1963-05-01			0	0	0
1963-06-01			0.06	0.81	0
1963-07-01			0	0	0
1963-08-01			1.25	0.2	0.36
1963-09-01			2.02	0.89	1.04
1963-10-01			1.45	1.51	1.65
1963-11-01			0.35	1.06	0.64
1963-12-01			0	0	0
1964-01-01			0.25	0.44	0
1964-02-01			0	0.15	0
1964-03-01			0.88	0.89	0.02
1964-04-01			0.5	0.3	0.33
1964-05-01			0.47	0.61	0
1964-06-01			0.07	0.12	0
1964-07-01			1.18	0.85	0.3
1964-08-01			0.1	1.39	0.19
1964-09-01			0	0	0.02
1964-10-01			0.01	0.01	0.06
1964-11-01			1.09	2.25	0.87
1964-12-01			0	0.2	0.21
1965-01-01			0.62	0.82	0.18
1965-02-01			0.34	0.7	0.42
1965-03-01			1.11	1	1.57
1965-04-01			2.94	2.81	2.81
1965-05-01			0.07	0.24	0
1965-06-01			0	0	0
1965-07-01			0.19	0.82	0.12
1965-08-01			0.78	1.78	0.05
1965-09-01			0	0	0.11
1965-10-01			0.16		0.15
1965-11-01			3.24		1.72
1965-12-01			3.01		2.45
1966-01-01			0.06		0.17
1966-02-01			0.62		0.99
1966-03-01			0.68	0.25	0.58
1966-04-01			0	0	0
1966-05-01			0.08	0	0
1966-06-01			0	0	0.02
1966-07-01			0.74		0.17
1966-08-01			0.24		0.09
1966-09-01			0.09		0.04
1966-10-01			0.5	0	0.66
1966-11-01			1.35	0.02	0.4
1966-12-01			0.97	2.35	0.89
1967-01-01			0.4	1.15	0.19
1967-02-01			0	0	0
1967-03-01			0	0.7	0.01
1967-04-01			0.48	0.6	0.32
1967-05-01			0	0	0.01
1967-06-01			0	0	0
1967-07-01			1.05	0.07	0.2
1967-08-01			1.05	1.83	0.1
1967-09-01			0.73	0.01	0.77
1967-10-01			0	0	0
1967-11-01			1.11	1.25	0.52
1967-12-01			1.55	0.95	0.71
1968-01-01			0	0	0
1968-02-01			0.47	0	0.43
1968-03-01			1.19	0	0.32
1968-04-01			0.45	0	0
1968-05-01			0.21	0	0
1968-06-01			0	0	0.14
1968-07-01			2.03	3.63	1.55
1968-08-01			0.94	2.6	0.01
1968-09-01			0	0	0
1968-10-01			0.05	0	0
1968-11-01			0.56	0.8	0.09
1968-12-01			0.28	0.01	0.19
1969-01-01			2.55	2.8	0.59
1969-02-01			3.19	1.74	0.17
1969-03-01			0.17	0.55	0.04
1969-04-01			0.33	0.25	0
1969-05-01			1.38	0	0.17
1969-06-01			0.36	0.5	0.02
1969-07-01			0.03	0.65	0.09
1969-08-01			1.64	1.49	0.14
1969-09-01			1.45	1.68	1.99
1969-10-01			0.1	0.18	0.04
1969-11-01			0.43	0.42	0.25
1969-12-01			0	0.01	0
1970-01-01			0.29	0.13	0.01
1970-02-01			1.73	0.78	0.82
1970-03-01			0.69	0.46	0.33
1970-04-01			0.28	0.03	0.02
1970-05-01			0	0	0
1970-06-01			0.31	0	0
1970-07-01			0.03	1.76	0.56
1970-08-01			1.27	3.15	1.45
1970-09-01			0	0	0.1
1970-10-01			0.07	0.02	0.03
1970-11-01			1.33	0.6	0.14
1970-12-01			1.06	0.19	0.26
1971-01-01			0	0	0
1971-02-01			0.16	0.06	0.08
1971-03-01			0.05	0.08	0
1971-04-01			0.05	0.06	0
1971-05-01			0.76	0.87	0.34
1971-06-01			0	0	0
1971-07-01			0.31	0.69	0.01
1971-08-01			2.87	1.04	2.8
1971-09-01			0	0	0.1
1971-10-01			0.2	0.2	0.31
1971-11-01			0.32	0.15	0.04
1971-12-01	0.11		0.99	0.63	0.6
1972-01-01	0		0	0	0
1972-02-01	0		0	0	0
1972-03-01	0		0	0	0
1972-04-01	0.02		0	0.16	0
1972-05-01	0.06		0	0.01	0
1972-06-01	1.25		0.67	1.61	0.41
1972-07-01	0		0	0	0.02
1972-08-01	0.21		0.79	1.41	0.36
1972-09-01	0.07		0.45	0.53	0.32
1972-10-01	0.64		0.86	0.31	0.9
1972-11-01	0.65		1.13	2.08	1.04
1972-12-01	0.09		0.95	1.52	0.16
1973-01-01	2.29		1.25		0.12
1973-02-01	1.02		1.11		0.82
1973-03-01	2		2.32	3.35	1.3
1973-04-01	0.08		0.51	0	0.06
1973-05-01	0		0.64	0.04	0
1973-06-01	0		0.26	0	0.08
1973-07-01	0		0	0	0
1973-08-01	0		0.75	1.3	0.24
1973-09-01	0		0	0.02	0
1973-10-01	0		0	0	0
1973-11-01	0.05		0.82	1.1	0.36
1973-12-01	0.03		0.12	0.02	0
1974-01-01	1.02		2.29	1.67	1.55
1974-02-01	0		0.06	0.03	0
1974-03-01	1.09		0.86	0.28	0.65
1974-04-01	0		0.17	0.2	0
1974-05-01	0.02		0	0.01	0
1974-06-01	0		0	0	0
1974-07-01	0.15		0.44	0.66	2.21
1974-08-01	0.35		1.09	0.98	0.29
1974-09-01	0		0.06	0.72	0.17
1974-10-01	2.28		0.97	3.48	0.09
1974-11-01	0		0.03	0.44	0.36
1974-12-01	0.33		1.08	0.95	0.4
1975-01-01	0.09		0	0.38	0
1975-02-01	0.43		0.27	0.18	0.21
1975-03-01	0.32		1.03	0.95	0.49
1975-04-01	0.39		1.35	2.7	0.08
1975-05-01	0		0.02	0	0
1975-06-01	0		0	0	0
1975-07-01	0.04		0.02	0.05	0.01
1975-08-01	0		0.43	0.2	0
1975-09-01	0.1		0.24	0	1.6
1975-10-01	0.05		0.66	0.27	0.11
1975-11-01	0		0.09	0.17	0.08
1975-12-01	0		0.1	0	0.19
1976-01-01	0		0	0	0
1976-02-01	2.03		5.94	1.84	1.56
1976-03-01	0.08		0.41	0.28	0
1976-04-01	0.15		1.39	0.19	0.48
1976-05-01	0.23		0.02	0.45	0
1976-06-01	0		0.03	0	0
1976-07-01	0.12		0.26	0.22	0.01
1976-08-01	0		0	0	0.14
1976-09-01	2.44		2.42	3.43	4.72
1976-10-01	0.21		1.23	0.28	0.84
1976-11-01	0		0	0	0.23
1976-12-01	0.6		0.2	0.06	0.28
1977-01-01	0.13		1.5	0.64	0.25
1977-02-01	0		0	0	0
1977-03-01	0.61		0.61	0.72	0.26
1977-04-01	0.1		0.1	0	0.06
1977-05-01	0.92		0.79	1.16	0.21
1977-06-01	0		0.03	0.27	0.01
1977-07-01			0	0.1	0.12
1977-08-01	1.78		6.14	3.64	1.52
1977-09-01	0.09		0.51	0.54	0.37
1977-10-01			0.87	0.38	0
1977-11-01	0.08		0.58	0.52	0.03
1977-12-01	0.96		1.11	1.4	0.11
1978-01-01	1.58		3.87	2	2.39
1978-02-01	1.25		4.12	1.79	1.23
1978-03-01	1.04		3.07	2.27	1.29
1978-04-01	0.23		0.51	1.01	0.88
1978-05-01	0.3		0.71	0.56	0.11
1978-06-01	0		0	0	0
1978-07-01	0		0.28	0.27	0.06
1978-08-01	0		0	0.67	0
1978-09-01	0		0.11	0	0
1978-10-01	0		1.09	0.16	0.79
1978-11-01	0.61		1.75	2.18	0.75
1978-12-01	0.11		1.74	2.25	1.26
1979-01-01			2.16	1.99	1.09
1979-02-01	0.14		1.64	0.61	0.23
1979-03-01	2.24		3.88	2.2	1.34
1979-04-01	0		0	0	0
1979-05-01			0	0.02	0.03
1979-06-01			0	0	0
1979-07-01			3.52	1.97	1.38
1979-08-01			8.39	2.45	0.66
1979-09-01			0	0	0
1979-10-01			0.29	0.3	0.07
1979-11-01			0	0.13	0
1979-12-01	0.41		0.2	-----	0
1980-01-01	1.23		5.8	2.13	2.15
1980-02-01	1.8		8.08	2.66	1.21
1980-03-01	0.64		2.23	1.71	0.88
1980-04-01	0.41		0.82	0.72	0.76
1980-05-01	0		0.51	0.37	0.02
1980-06-01	0.21		-----	0.2	0.01
1980-07-01	0		0.31	3.33	1.55
1980-08-01	0		0	0	0
1980-09-01	0.36		1.6	0.64	0.32
1980-10-01	0		1.07	0.29	0.05
1980-11-01	0		0	0	0
1980-12-01	0		0	0	0.04
1981-01-01	0.36		1.18	0.71	0.04
1981-02-01	0.04		1.19	0.76	0.22
1981-03-01	0.47		3.44	1.24	0.92
1981-04-01	0		0.23	0.03	0
1981-05-01	0.78		1.1	1.34	0.18
1981-06-01	0		0.01		0.01
1981-07-01	0		0.26		0.11
1981-08-01	0.24		0.6		0.28
1981-09-01	0.31		1.73		0.68
1981-10-01	0		0.92	0.64	0.63
1981-11-01	0		0.82	0.82	0.44
1981-12-01	0		0.09	0.08	0
1982-01-01	0		1.28	1.69	0.22
1982-02-01	0		0.5	0.74	0.83
1982-03-01	1.01		2.5	1.46	0.88
1982-04-01			0.68	0.16	0.03
1982-05-01			0.57		0.38
1982-06-01	0		0		0
1982-07-01	0		0.75		0.38
1982-08-01	0.69		2.47	2.32	3.37
1982-09-01	0		3.42		0.1
1982-10-01	0		0.07	0.32	0.09
1982-11-01	0.87		1.34	2.13	0.62
1982-12-01			1.73	1.11	0.99
1983-01-01	0.44		1.07	0.78	0.16
1983-02-01	0.87		1.89	1.73	0.91
1983-03-01	2.59		6.24	2.73	1.89
1983-04-01	0.7		0.65	0.13	0.19
1983-05-01	0		0	0	0
1983-06-01	0		0		0
1983-07-01			0.39		0.04
1983-08-01	1.95		8.89		3.33
1983-09-01	0.17		0.11		0.54
1983-10-01	0.51		1.99		1.14
1983-11-01	0.07		0.05	1.05	0.07
1983-12-01	0.37		1.57	0.4	0.42
1984-01-01	0		0	0	0
1984-02-01	0		0.01	0	0
1984-03-01	0		0	0	0
1984-04-01	0		0.15	0.22	0.02
1984-05-01	0		0	0	0
1984-06-01	0		0	0	0
1984-07-01	2.08		9.58	5.9	0.59
1984-08-01	0.3		4.45	1.89	1.6
1984-09-01	0.23		0.02	0	0.38
1984-10-01	0		0	0	0
1984-11-01	0.54		1.19	1.44	0.64
1984-12-01	1.54		4.68	2.15	2.6
1985-01-01	0.2		1.68	1.25	1.23
1985-02-01	0		0.47	0.9	0.16
1985-03-01	0.08		0.08	0.27	0.33
1985-04-01	0.05		0.35	0.29	0.09
1985-05-01	0		0	0	0
1985-06-01	0		0	0	0
1985-07-01	0.15		0	1.27	0.12
1985-08-01	0		0	0	0
1985-09-01	0.34		1.93	0.69	0.44
1985-10-01	0.04		0.03	0.68	0.26
1985-11-01	0.59		2.56	1.06	1.22
1985-12-01	0		0.08	0.49	0.14
1986-01-01	0.07		0.63	0.51	0.3
1986-02-01	0.43		0.61	0.68	0.58
1986-03-01	0.94		2.46	1.67	0.58
1986-04-01	0.07		0.05	0.21	0.25
1986-05-01	0.04		0.02	0.07	0
1986-06-01	0		0	0.21	0
1986-07-01	1.16		0.25	0.5	0.12
1986-08-01	0.83		1.18	1.47	1.48
1986-09-01	0		0.07	0	0.1
1986-10-01	0		0.81	0.42	0.59
1986-11-01	1.03		0.47	0.7	0.62
1986-12-01	1.02		2.78	2.02	1.14
1987-01-01	0.44		1.16	0.75	0.2
1987-02-01	0.32		1.17	1.12	0.04
1987-03-01	0.22		1.09	0.6	0.02
1987-04-01	0		0.21	0.3	0.02
1987-05-01	0.02		0.71	1.36	0.02
1987-06-01	0.48		0.21	0.83	0.07
1987-07-01	0.2		1.43	0.04	0
1987-08-01	0.01		0.05	0.86	0
1987-09-01	0.12		0.09	0.39	0.26
1987-10-01			3.1	0.82	0.65
1987-11-01	1.63		2.41	0.77	1.53
1987-12-01	0.4		1.65	1.03	0.1
1988-01-01	0.5		1.63	0.98	0.51
1988-02-01	0.15		0.63	0.3	0.94
1988-03-01	0		0	0.04	0.03
1988-04-01	2.02		2.77	2.49	2.34
1988-05-01	0		0	0	0
1988-06-01	0		0.21	0	0.03
1988-07-01	0		0.09	0	0.26
1988-08-01	2.53		7.87	2.88	1.94
1988-09-01	0		0	0	0.09
1988-10-01	0		0	0	0.02
1988-11-01	0.18		0.45	0.6	0.15
1988-12-01	0.15		0.55	0.4	0
1989-01-01	1		2.45	1.05	1.07
1989-02-01	0.1		0.32	0.75	0
1989-03-01	0.15		0.42	0.3	0
1989-04-01	0		0	0	0
1989-05-01	0.03		0.09	0.5	0.02
1989-06-01	0		0	0	0
1989-07-01	0		0.34	0.3	0.07
1989-08-01	0.4		0.68	0.14	0.2
1989-09-01	0		0.04	0	0.04
1989-10-01	0		0.03	0.8	0.3
1989-11-01	0		0	0	0
1989-12-01	0		0.17	0.25	0.09
1990-01-01	0.7		1	1.26	0.92
1990-02-01	0.11		0.44	0.64	0.12
1990-03-01	0		0	0	0.1
1990-04-01	0.14		1.21	0.2	0.24
1990-05-01	0.13		0.12	0.28	0.73
1990-06-01			1.22	2.98	0
1990-07-01			1.97	1.98	0.84
1990-08-01			0.7	0.45	0.28
1990-09-01			1.63	2.76	1.7
1990-10-01			1.9	0	0.1
1990-11-01			0	0.09	0.03
1990-12-01			1.5	0.03	0
1991-01-01			-----	1.2	1.35
1991-02-01			1.8	0.53	0.34
1991-03-01			2.84	2.11	2.12
1991-04-01			0	0	0
1991-05-01			0	0	0
1991-06-01			0.36	0.33	0.1
1991-07-01			0.98	3.48	0
1991-08-01			1.24	0.47	0
1991-09-01		0.07	2.19	0.45	0.54
1991-10-01		0.36	0.54	0.4	0
1991-11-01		0.25	0	0.3	0.4
1991-12-01		0.81	1.58	0.73	0.87
1992-01-01		0.94	1.32	0.73	0.71
1992-02-01		3.52	5.23	2.75	1.76
1992-03-01		6.78	9.56	4.94	3.19
1992-04-01		0.02	0	0.14	0.02
1992-05-01		0.58	0.42	0.22	0.75
1992-06-01		0	-----	0	0
1992-07-01		0.5	0.28	0.33	0
1992-08-01		0.95	0	3.97	0.8
1992-09-01		0	0.12	0.1	0.02
1992-10-01		1.56	0.52	0.86	0.59
1992-11-01		0	0	0	0
1992-12-01		1.55	2.16	2.21	1.57
1993-01-01		3.93	5.57	3.55	3.64
1993-02-01		3.33	4.04	2.08	2.54
1993-03-01		0.82	1.04	0.14	0.43
1993-04-01		0	0	0	0
1993-05-01		0.12	0.22	0.25	0.09
1993-06-01		0.79	0.53	0.75	0.01
1993-07-01		0	0	0	0
1993-08-01		0.34	1.63	0.18	0.16
1993-09-01		0	0	0	0
1993-10-01		0.08	0.62	0.01	0
1993-11-01		0.57	0.88	0.77	0.34
1993-12-01		0.35	0.4	0.55	0.01
1994-01-01		0.1	0.22	0.06	0.15
1994-02-01		0.72	0.56	0.3	0.29
1994-03-01		1.1	0.95	0.85	1.42
1994-04-01		0.15	0.33	0.34	0
1994-05-01		0.1	0.11	0.31	0.15
1994-06-01		0.01	0	0	0
1994-07-01		0.7	0.04	0.07	0.09
1994-08-01		1.15	0.15	0.43	0.09
1994-09-01		0.36	0.18	0.49	0
1994-10-01		1.02	0.82	0.27	0.16
1994-11-01		0.83	1	1.07	0.38
1994-12-01		1.9	2.34	1.68	1.81
1995-01-01		3.77	5.75	3.53	2.34
1995-02-01		0.48	0.83	0.8	0.23
1995-03-01		2.59	2.39	1.43	0.44
1995-04-01		0.38	0.5	0.32	0.35
1995-05-01		0.72	0.29	0.18	0.13
1995-06-01		0.3	0.06	0.09	0
1995-07-01		0	0.01	0	0
1995-08-01		1.12	0.2	0.71	0.19
1995-09-01		0.58	1.06	0.07	0.03
1995-10-01		0	0	0	0
1995-11-01		0	0	0	0
1995-12-01		0.25	0.27	0.41	0
1996-01-01		0.5	0.2	0.76	0.01
1996-02-01		0.98	1	1.42	0.22
1996-03-01		0.54	0.59	1.06	0.04
1996-04-01		0	0	0	0
1996-05-01		0.24	0.33	0.32	0.15
1996-06-01		0	0	0.02	0
1996-07-01		0.46	1.14	0.94	0.46
1996-08-01		0.09	0.37	0.49	0.03
1996-09-01	0	0.04	0.02	1.14	0.92
1996-10-01	0.29	0.37	0.93	0.51	0.12
1996-11-01	0.59	0.75	0.86	1.09	0.52
1996-12-01	0.13	0.31	0.13	0.36	0.01
1997-01-01	0.52	1.01	1.5	1.38	0.53
1997-02-01	0.1	0.14	0.58	0.11	0.1
1997-03-01	0	0.01	0	0	0
1997-04-01	0	0.03	0.13	0	0.05
1997-05-01	0.01	0.24	0	0	0
1997-06-01	0.01	0	0.03	0	0.06
1997-07-01	1.08	0.34	0.72	0.64	0.04
1997-08-01	0.52	0.04	0.14	0.14	0.33
1997-09-01	1.89	3.56	4.7	3.78	1.61
1997-10-01	0.01	0.03	0.02	0	0.1
1997-11-01	0.05	0.25	0.59	0.4	0.32
1997-12-01	0.34	0.33	0.56	0.5	0.29
1998-01-01	0.17	0.37	0.86	0.6	0.38
1998-02-01	3.43	3.57	6.79	5.1	3.6
1998-03-01	0.6	2.07	2.99	2.4	0.46
1998-04-01	0.08	0.81	0.64	0.75	0.12
1998-05-01	0.55	0.34	0.31	1.33	0.05
1998-06-01	0	0.04	0	0.17	0
1998-07-01	0	0.72	0.67	0.85	0.29
1998-08-01	0.94	4.51	1.26	0.11	0.06
1998-09-01	0.42	2.83	3.01	1.2	2.63
1998-10-01	0.18	0.33	0.38	0.4	0.1
1998-11-01	0.06	0.25	0.08	0.51	0.28
1998-12-01	0	0.01	0.35	0.06	0
1999-01-01	0.18	0.12	0.34	0.13	0.02
1999-02-01	0.15	0.1	0.2	0.29	0.44
1999-03-01	0.02	0.03	0.03	0.06	0
1999-04-01	0.63	1.54	3.11	1.22	0.49
1999-05-01	0	0.34	0.33	0.21	0
1999-06-01	0.25	0.2	0.33	0	0.01
1999-07-01	0.35	2.08	2.8	4.51	0.77
1999-08-01	0.05	0.49	0.51	0.37	0.13
1999-09-01	0.52	1.56	1.14	1.88	0.43
1999-10-01	0	0	0	0	0
1999-11-01	0	0	0	0	0
1999-12-01	0	0	0	0	0
2000-01-01	0	0.06	0.16	0.23	0
2000-02-01	0.88	2.52	2.42	3.81	0.32
2000-03-01	0.1	0.72	1.1	0.4	1.21
2000-04-01	0.07	0.21	0.05	0.57	0
2000-05-01	0	0	0	0	0
2000-06-01	0	0.86	0	0	0.48
2000-07-01	0	0.29	0	0	0
2000-08-01	0.29	2.74	1.02	3.69	0.21
2000-09-01	0	0	0.03	0	0.02
2000-10-01	0.31	1.08	2.08	1.18	0.64
2000-11-01	0.01	0.11	0.01	0	0
2000-12-01	0	0	0.02	0.01	0
2001-01-01	0.92	1.71	2.03	1.68	1.59
2001-02-01	2.02	1.2	3.34	1.7	0.99
2001-03-01	0.57	1.03	1.31	1.12	1.21
2001-04-01	0.01	0.6	0.6	0.38	0.15
2001-05-01	0	0.04	0	0	0
2001-06-01	0	0	0	0	0
2001-07-01	0.32	0.88	1.11	2.49	0.12
2001-08-01	0	1.01	0.09	0.16	0.29
2001-09-01	0	0	0	0	0
2001-10-01	0	0.07	0.03	0.85	0
2001-11-01	0.09	0.56	0.64	0.16	0.09
2001-12-01	0.11	0.31	0.33	0.41	0.22
2002-01-01	0.01	0.07	0.2	0.04	0.03
2002-02-01	0	0	0	0	0
2002-03-01	0	0.11	0.11	0.26	0.02
2002-04-01	0	0	0.05	0	0.04
2002-05-01	0	0	0	0	0
2002-06-01	0	0	0	0	0
2002-07-01	0.3	0.66	1.17	1.04	0.02
2002-08-01	0	0	0	0	0
2002-09-01	0.08	0.06	0.19	0.23	0.08
2002-10-01	0.17	1.29	0.58	0.59	0.25
2002-11-01	0.32	1.61	1.24	0.15	0.48
2002-12-01	0.11	0.13	0.76	0.47	0
2003-01-01	0.04	0.17	0.32	0.13	0.3
2003-02-01	1.45	2.02	3.26	1.09	1.97
2003-03-01	0.96	1.33	0.87	1.26	0.81
2003-04-01	0.8	1.42	1.99	1.34	0.17
2003-05-01	0.03	0.1	0.11	0.09	0.01
2003-06-01	0	0	0	0	0
2003-07-01	0.03	0.16	0.08	0.65	0.02
2003-08-01	1.98	1.37	1.59	1.99	0.58
2003-09-01	0.01	0.27	0.38	0.75	0.27
2003-10-01	0.06	0	0	0	0
2003-11-01	0.97	1.05	0.95	1.14	0.37
2003-12-01	0.25	0.77	1.24	0.92	0.06
2004-01-01	0.05	0.06	0.26	0.23	0
2004-02-01	1.63	2.71	3.56	2.17	1.52
2004-03-01	0.65	0.36	0.74	0.62	0.06
2004-04-01	0.24	2.08	2.23	1.59	1.04
2004-05-01	0	0	0	0	0
2004-06-01	0	0	0	0.01	0
2004-07-01	0	0.02	0.35	0.59	0
2004-08-01	0.2	0.45	3.27	0.14	0.4
2004-09-01	0.06	0.38	0.01	2.7	0.08
2004-10-01	0.79	2.47	3.03	2.09	1.33
2004-11-01	0.6	2.31	1.29	1.94	1.39
2004-12-01	0.93	4.22	5.18	2.2	0.51
2005-01-01	1.77	4.37	5.24	2.39	1.84
2005-02-01	3.28	4.44	6.74	3.7	2.38
2005-03-01	0.75	0.96	0.91	0.61	0.15
2005-04-01	0.05	0.16	-----	0.13	0
2005-05-01	0	0	-----	0	0
2005-06-01	0	0	0	0	0
2005-07-01	0.23		2.02	0.9	0
2005-08-01	1.1	1.21	1.71	2.71	0.67
2005-09-01	1.07	0.4	0.39	0.53	0
2005-10-01	0	2.52	2.11	1.55	0
2005-11-01	0.01	0	0	0	0.03
2005-12-01	0	0.03	0	0.03	0
2006-01-01	0.04	0.12	0.05	0.13	0
2006-02-01	0.01	0.39	0	0.39	0
2006-03-01	0.13	0.51	0.28	1.13	0.12
2006-04-01	0.56	0.47	0	1.14	0.02
2006-05-01	0.01	0	0	0.16	0
2006-06-01	0.04	0.13	0		0.14
2006-07-01	0.26	1.16	1.72		0.15
2006-08-01	0	0	0.13		0
2006-09-01	0.28	0.21	0.74		0.04
2006-10-01	0.79	1.78	1.48	1.62	0.18
2006-11-01	0.01	0	0	0	0
2006-12-01	0.16	0.27	0.32	0.25	0.05
2007-01-01	0	0	0.3	0	0.17
2007-02-01	0.06	0.53	0.28	0	0.02
2007-03-01	0.05	0.04	0.02	0.5	0.05
2007-04-01	0	0.09	0	0.18	0.06
2007-05-01	0	0	0	0	0
2007-06-01	0	0	0	0	0
2007-07-01	0	1.21	1.92		0.02
2007-08-01	0	1.17	0.49		0
2007-09-01	2.81	1.85	3.09		0.25
2007-10-01	0	0	0		0
2007-11-01	0	1.88	0		0.73
2007-12-01	0.73	0.75	2.28		0.31
2008-01-01	0.54	1.67	1.46		1.1
2008-02-01	0.16	0.23	0.61		0.49
2008-03-01	0	0.08	0.03		0.02
2008-04-01	0	0	0		0
2008-05-01	0.35	0.38	0.13		0
2008-06-01	0	0	0		0
2008-07-01	0.05	1.14	0.53		0.49
2008-08-01	0	0.34	0.26		1.7
2008-09-01	0	0.33	0.15		0.03
2008-10-01	0	0.01	0.02		0
2008-11-01	0.72	1.86	2.11		0.86
2008-12-01	1.04	0.28	2.7		1.12
2009-01-01	0.02	0.02	0.04		0.06
2009-02-01	0.49	1.34	1.1		0.93
2009-03-01	0	0.08	0		0
2009-04-01	0.02	0.35	0.12		0
2009-05-01	0	0	0.2		0.01
2009-06-01	0	0.01	0		0
2009-07-01	0.05	0.68	0		0
2009-08-01	0	0.88	0.03		0.4
2009-09-01	0	0.41	0.03		0
2009-10-01	0	0	0		0
2009-11-01	0	0.06	0		0.1
2009-12-01	0.29	0.67	1.44		0.76
2010-01-01	1.74	2.25	3.94		2.7
2010-02-01	2.24	1.77	2.77		0.75
2010-03-01	0.15	0.93	1.07		0.63
2010-04-01	0.01	0.37	0.3		0
2010-05-01	0	0.01	0		0
2010-06-01	0	0	0		0.12
2010-07-01	0	0.1	0		0
2010-08-01	0.35	0.1	0.01		0.08
2010-09-01	0	0	0		0.01
2010-10-01	0.99	1.11	1.24		0.46
2010-11-01	0.05	0.17	0.01		0
2010-12-01	3.4	5.6	7.09		1.21
2011-01-01	0	0	0		0
2011-02-01	0.21	1.16	0.64		0.72
2011-03-01	0.17	0.5	0.81		0.08
2011-04-01	0	0.08	0.11		0.09
2011-05-01	0.2	0.02			0.45
2011-06-01	0	0			0
2011-07-01	0.47	0.35			0.17
2011-08-01	0.2	0.12			0.04
2011-09-01	1.11	0.86			1.1
2011-10-01	0.09	0.39			0.39
2011-11-01	0.41	0.43			0.31
2011-12-01	0.35	0.03			0.29
2012-01-01	0.02	0			0
2012-02-01	0.02	0			0.09
2012-03-01	0.01	0			0.11
2012-04-01	0.16	0			0.42
2012-05-01	0	0.02			0
2012-06-01	0	0			0
2012-07-01	1.45	2.48			1.37
2012-08-01	0.18	4.23			0.32
2012-09-01	1.45	0.56			0.21
2012-10-01	0.24	0			0.72
2012-11-01	0	0			0
2012-12-01	0.9	0.05			0.99
2013-01-01	0.42	0.57			0.46
2013-02-01	0	0.21			0.08
2013-03-01	0.23	0.21			0.25
2013-04-01	0.05	0.03			0
2013-05-01	0	0.46			0
2013-06-01	0	0			0
2013-07-01	0.03	2.08			0.18
2013-08-01	0.37	2.35			2.84
2013-09-01		0.63			0.26
2013-10-01		0.2			0.03
2013-11-01		2.4			0.91
2013-12-01		0.01			0.01
2014-01-01		0			0
2014-02-01		0.75			0.08
2014-03-01		0.05			0
2014-04-01		0.82			0.01
2014-05-01		0.01			0
2014-06-01		0			0
2014-07-01		0.08			1.73
2014-08-01		2.31			2.7
2014-09-01		1.23			0.87
2014-10-01		0			0.1
2014-11-01		0.03			0
2014-12-01		0.99			0.39
2015-01-01		1.05			0.67
2015-02-01		0.44			0.45
2015-03-01		0.47			0.79
2015-04-01		0.21			0
2015-05-01		0.07			0.04
2015-06-01		0.13			0.21
2015-07-01		2.25			1.07
2015-08-01		0.82			0
2015-09-01		1.02			0
2015-10-01		1.14			0.69
2015-11-01		0.26			0
2015-12-01		0.24			0.08
2016-01-01		1.95			0.59
2016-02-01		0.21			0.01
2016-03-01		0.56			0.03
2016-04-01		1.59			1.59
2016-05-01		0.18			0.01
2016-06-01		0.08			0
2016-07-01		0.63			0
2016-08-01		1.6			0
2016-09-01		0.27			0
2016-10-01		0.17			0
2016-11-01		0.22			0.01
2016-12-01		2.19			1.03
2017-01-01		2.61			0.96
2017-02-01		1.48			0.95
2017-03-01		0.04			0.06
2017-04-01		0			0
2017-05-01		0.03			0.18
2017-06-01		0			0
2017-07-01		0.43			0
2017-08-01		0.52			0.16
2017-09-01		1.92			0.26
2017-10-01		0			0
2017-11-01		0			0
2017-12-01		0			0
2018-01-01		1.74			0.41
2018-02-01		0.12			0.2
2018-03-01		1.3			0.23
2018-04-01		0.03			0
2018-05-01		0.61			0
2018-06-01		0			0
2018-07-01		2.42			0.93
2018-08-01

## Sheet: Baker
Baker
YEAR(S)	JAN		FEB		MAR		APR		MAY		JUN		JUL		AUG		SEP		OCT		NOV		DEC		ANN
1971	-----	z	-----	z	-----	z	-----	z	-----	z	-----	z	-----	z	-----	z	-----	z	-----	z	-----	z	0.11		0.11	k
1972	0		0		0		0.02		0.06		1.25		0		0.21		0.07		0.64		0.65		0.09		2.99
1973	2.29		1.02		2		0.08		0		0		0		0		0		0		0.05		0.03		5.47
1974	1.02		0		1.09		0		0.02		0		0.15		0.35		0		2.28		0		0.33		5.24
1975	0.09		0.43		0.32		0.39		0		0		0.04		0		0.1		0.05		0		0		1.42
1976	0		2.03		0.08		0.15		0.23		0		0.12		0		2.44		0.21		0		0.6		5.86
1977	0.13		0		0.61		0.1		0.92		0		-----	z	1.78		0.09		-----	z	0.08		0.96		4.67	b
1978	1.58		1.25		1.04		0.23		0.3		0		0		0		0		0		0.61		0.11		5.12
1979	-----	z	0.14		2.24		0		-----	z	-----	z	-----	z	-----	z	-----	z	-----	z	-----	z	0.41		2.79	h
1980	1.23		1.8		0.64		0.41		0		0.21		0		0		0.36		0		0		0		4.65
1981	0.36		0.04		0.47		0		0.78		0		0		0.24		0.31		0		0		0		2.2
1982	0	a	0	h	1.01		-----	z	-----	z	0		0		0.69	a	0		0		0.87		-----	z	2.57	d
1983	0.44	a	0.87		2.59	a	0.7		0		0	i	-----	z	1.95		0.17		0.51		0.07		0.37		7.67	b
1984	0		0		0		0		0		0		2.08		0.3		0.23		0		0.54		1.54	a	4.69
1985	0.2		0		0.08		0.05		0		0		0.15		0		0.34		0.04		0.59		0		1.45
1986	0.07		0.43		0.94		0.07	b	0.04		0		1.16		0.83		0		0	b	1.03		1.02		5.59
1987	0.44		0.32		0.22		0		0.02		0.48		0.2		0.01		0.12		-----	z	1.63		0.4		3.84	a
1988	0.5		0.15		0		2.02		0		0		0		2.53		0		0		0.18	a	0.15		5.53
1989	1		0.1		0.15		0		0.03		0		0		0.4	a	0	a	0		0		0		1.68
1990	0.7	a	0.11		0		0.14		0.13		-----	z	-----	z	-----	z	-----	z	-----	z	-----	z	-----	z	1.08	g
1991	-----	z	-----	z	-----	z	-----	z	-----	z	-----	z	-----	z	-----	z	-----	z	-----	z	-----	z	-----	z	0	l
1992	-----	z	-----	z	-----	z	-----	z	-----	z	-----	z	-----	z	-----	z	-----	z	-----	z	-----	z	-----	z	0	l
1993	-----	z	-----	z	-----	z	-----	z	-----	z	-----	z	-----	z	-----	z	-----	z	-----	z	-----	z	-----	z	0	l
1994	-----	z	-----	z	-----	z	-----	z	-----	z	-----	z	-----	z	-----	z	-----	z	-----	z	-----	z	-----	z	0	l
1995	-----	z	-----	z	-----	z	-----	z	-----	z	-----	z	-----	z	-----	z	-----	z	-----	z	-----	z	-----	z	0	l
1996	-----	z	-----	z	-----	z	-----	z	-----	z	-----	z	-----	z	-----	z	0		0.29		0.59		0.13		1.01	h
1997	0.52		0.1		0		0		0.01		0.01		1.08		0.52		1.89		0.01		0.05		0.34		4.53
1998	0.17		3.43		0.6		0.08	a	0.55		0		0		0.94		0.42		0.18		0.06		0		6.43
1999	0.18		0.15		0.02		0.63		0		0.25		0.35		0.05		0.52		0		0		0		2.15
2000	0	a	0.88		0.1		0.07		0		0		0		0.29		0		0.31		0.01		0		1.66
2001	0.92		2.02		0.57		0.01		0		0		0.32		0		0		0		0.09		0.11	b	4.04
2002	0.01		0		0		0	a	0		0	a	0.3		0	b	0.08	a	0.17		0.32		0.11		0.99
2003	0.04		1.45		0.96		0.8		0.03		0		0.03		1.98	a	0.01		0.06		0.97		0.25	a	6.58
2004	0.05		1.63		0.65		0.24	a	0		0		0		0.2		0.06		0.79		0.6		0.93		5.15
2005	1.77	a	3.28		0.75	a	0.05		0		0		0.23		1.1		1.07		0		0.01		0		8.26
2006	0.04	a	0.01		0.13		0.56	e	0.01	j	0.04		0.26		0		0.28		0.79		0.01	c	0.16	b	2.28	a
2007	0		0.06	e	0.05	w	0		0		0		0		0		2.81		0		0		0.73		3.6	a
2008	0.54		0.16		0		0		0.35		0		0.05		0		0		0		0.72		1.04		2.86
2009	0.02		0.49		0		0.02	a	0		0		0.05		0		0		0		0		0.29		0.87
2010	1.74		2.24		0.15		0.01		0		0		0		0.35		0		0.99		0.05		3.4		8.93
2011	0		0.21		0.17		0		0.2		0		0.47		0.2		1.11		0.09		0.41		0.35		3.21
2012	0.02		0.02	b	0.01		0.16	a	0		0	a	1.45		0.18		1.45	b	0.24		0	d	0.9		4.43
2013	0.42		0		0.23	b	0.05	b	0	a	0		0.03		0.37		-----	z	-----	z	-----	z	-----	z	1.1	d
YEAR(S)	1971	1972	1973	1974	1975	1976	1977	1978	1979	1980	1981	1982	1983	1984	1985	1986	1987	1988	1989	1990	1991	1992	1993	1994	1995	1996	1997	1998	1999	2000	2001	2002	2003	2004	2005	2006	2007	2008	2009	2010	2011	2012	2013
JAN	-----	0	2.29	1.02	0.09	0	0.13	1.58	-----	1.23	0.36	0	0.44	0	0.2	0.07	0.44	0.5	1	0.7	-----	-----	-----	-----	-----	-----	0.52	0.17	0.18	0	0.92	0.01	0.04	0.05	1.77	0.04	0	0.54	0.02	1.74	0	0.02	0.42
FEB	-----	0	1.02	0	0.43	2.03	0	1.25	0.14	1.8	0.04	0	0.87	0	0	0.43	0.32	0.15	0.1	0.11	-----	-----	-----	-----	-----	-----	0.1	3.43	0.15	0.88	2.02	0	1.45	1.63	3.28	0.01	0.06	0.16	0.49	2.24	0.21	0.02	0
MAR	-----	0	2	1.09	0.32	0.08	0.61	1.04	2.24	0.64	0.47	1.01	2.59	0	0.08	0.94	0.22	0	0.15	0	-----	-----	-----	-----	-----	-----	0	0.6	0.02	0.1	0.57	0	0.96	0.65	0.75	0.13	0.05	0	0	0.15	0.17	0.01	0.23
APR	-----	0.02	0.08	0	0.39	0.15	0.1	0.23	0	0.41	0	-----	0.7	0	0.05	0.07	0	2.02	0	0.14	-----	-----	-----	-----	-----	-----	0	0.08	0.63	0.07	0.01	0	0.8	0.24	0.05	0.56	0	0	0.02	0.01	0	0.16	0.05
MAY	-----	0.06	0	0.02	0	0.23	0.92	0.3	-----	0	0.78	-----	0	0	0	0.04	0.02	0	0.03	0.13	-----	-----	-----	-----	-----	-----	0.01	0.55	0	0	0	0	0.03	0	0	0.01	0	0.35	0	0	0.2	0	0
JUN	-----	1.25	0	0	0	0	0	0	-----	0.21	0	0	0	0	0	0	0.48	0	0	-----	-----	-----	-----	-----	-----	-----	0.01	0	0.25	0	0	0	0	0	0	0.04	0	0	0	0	0	0	0
JUL	-----	0	0	0.15	0.04	0.12	-----	0	-----	0	0	0	-----	2.08	0.15	1.16	0.2	0	0	-----	-----	-----	-----	-----	-----	-----	1.08	0	0.35	0	0.32	0.3	0.03	0	0.23	0.26	0	0.05	0.05	0	0.47	1.45	0.03
AUG	-----	0.21	0	0.35	0	0	1.78	0	-----	0	0.24	0.69	1.95	0.3	0	0.83	0.01	2.53	0.4	-----	-----	-----	-----	-----	-----	-----	0.52	0.94	0.05	0.29	0	0	1.98	0.2	1.1	0	0	0	0	0.35	0.2	0.18	0.37
SEP	-----	0.07	0	0	0.1	2.44	0.09	0	-----	0.36	0.31	0	0.17	0.23	0.34	0	0.12	0	0	-----	-----	-----	-----	-----	-----	0	1.89	0.42	0.52	0	0	0.08	0.01	0.06	1.07	0.28	2.81	0	0	0	1.11	1.45	-----
OCT	-----	0.64	0	2.28	0.05	0.21	-----	0	-----	0	0	0	0.51	0	0.04	0	-----	0	0	-----	-----	-----	-----	-----	-----	0.29	0.01	0.18	0	0.31	0	0.17	0.06	0.79	0	0.79	0	0	0	0.99	0.09	0.24	-----
NOV	-----	0.65	0.05	0	0	0	0.08	0.61	-----	0	0	0.87	0.07	0.54	0.59	1.03	1.63	0.18	0	-----	-----	-----	-----	-----	-----	0.59	0.05	0.06	0	0.01	0.09	0.32	0.97	0.6	0.01	0.01	0	0.72	0	0.05	0.41	0	-----
DEC	0.11	0.09	0.03	0.33	0	0.6	0.96	0.11	0.41	0	0	-----	0.37	1.54	0	1.02	0.4	0.15	0	-----	-----	-----	-----	-----	-----	0.13	0.34	0	0	0	0.11	0.11	0.25	0.93	0	0.16	0.73	1.04	0.29	3.4	0.35	0.9	-----

## Sheet: Mid Hills
MidHills
Date	Precip (in)
1991-09-01	0.07
1991-10-01	0.36
1991-11-01	0.25
1991-12-01	0.81
1992-01-01	0.94
1992-02-01	3.52
1992-03-01	6.78
1992-04-01	0.02
1992-05-01	0.58
1992-06-01	0
1992-07-01	0.5
1992-08-01	0.95
1992-09-01	0
1992-10-01	1.56
1992-11-01	0
1992-12-01	1.55
1993-01-01	3.93
1993-02-01	3.33
1993-03-01	0.82
1993-04-01	0
1993-05-01	0.12
1993-06-01	0.79
1993-07-01	0
1993-08-01	0.34
1993-09-01	0
1993-10-01	0.08
1993-11-01	0.57
1993-12-01	0.35
1994-01-01	0.1
1994-02-01	0.72
1994-03-01	1.1
1994-04-01	0.15
1994-05-01	0.1
1994-06-01	0.01
1994-07-01	0.7
1994-08-01	1.15
1994-09-01	0.36
1994-10-01	1.02
1994-11-01	0.83
1994-12-01	1.9
1995-01-01	3.77
1995-02-01	0.48
1995-03-01	2.59
1995-04-01	0.38
1995-05-01	0.72
1995-06-01	0.3
1995-07-01	0
1995-08-01	1.12
1995-09-01	0.58
1995-10-01	0
1995-11-01	0
1995-12-01	0.25
1996-01-01	0.5
1996-02-01	0.98
1996-03-01	0.54
1996-04-01	0
1996-05-01	0.24
1996-06-01	0
1996-07-01	0.46
1996-08-01	0.09
1996-09-01	0.04
1996-10-01	0.37
1996-11-01	0.75
1996-12-01	0.31
1997-01-01	1.01
1997-02-01	0.14
1997-03-01	0.01
1997-04-01	0.03
1997-05-01	0.24
1997-06-01	0
1997-07-01	0.34
1997-08-01	0.04
1997-09-01	3.56
1997-10-01	0.03
1997-11-01	0.25
1997-12-01	0.33
1998-01-01	0.37
1998-02-01	3.57
1998-03-01	2.07
1998-04-01	0.81
1998-05-01	0.34
1998-06-01	0.04
1998-07-01	0.72
1998-08-01	4.51
1998-09-01	2.83
1998-10-01	0.33
1998-11-01	0.25
1998-12-01	0.01
1999-01-01	0.12
1999-02-01	0.1
1999-03-01	0.03
1999-04-01	1.54
1999-05-01	0.34
1999-06-01	0.2
1999-07-01	2.08
1999-08-01	0.49
1999-09-01	1.56
1999-10-01	0
1999-11-01	0
1999-12-01	0
2000-01-01	0.06
2000-02-01	2.52
2000-03-01	0.72
2000-04-01	0.21
2000-05-01	0
2000-06-01	0.86
2000-07-01	0.29
2000-08-01	2.74
2000-09-01	0
2000-10-01	1.08
2000-11-01	0.11
2000-12-01	0
2001-01-01	1.71
2001-02-01	1.2
2001-03-01	1.03
2001-04-01	0.6
2001-05-01	0.04
2001-06-01	0
2001-07-01	0.88
2001-08-01	1.01
2001-09-01	0
2001-10-01	0.07
2001-11-01	0.56
2001-12-01	0.31
2002-01-01	0.07
2002-02-01	0
2002-03-01	0.11
2002-04-01	0
2002-05-01	0
2002-06-01	0
2002-07-01	0.66
2002-08-01	0
2002-09-01	0.06
2002-10-01	1.29
2002-11-01	1.61
2002-12-01	0.13
2003-01-01	0.17
2003-02-01	2.02
2003-03-01	1.33
2003-04-01	1.42
2003-05-01	0.1
2003-06-01	0
2003-07-01	0.16
2003-08-01	1.37
2003-09-01	0.27
2003-10-01	0
2003-11-01	1.05
2003-12-01	0.77
2004-01-01	0.06
2004-02-01	2.71
2004-03-01	0.36
2004-04-01	2.08
2004-05-01	0
2004-06-01	0
2004-07-01	0.02
2004-08-01	0.45
2004-09-01	0.38
2004-10-01	2.47
2004-11-01	2.31
2004-12-01	4.22
2005-01-01	4.37
2005-02-01	4.44
2005-03-01	0.96
2005-04-01	0.16
2005-05-01	0
2005-06-01	0
2005-07-01	-9999
2005-08-01	1.21
2005-09-01	0.4
2005-10-01	2.52
2005-11-01	0
2005-12-01	0.03
2006-01-01	0.12
2006-02-01	0.39
2006-03-01	0.51
2006-04-01	0.47
2006-05-01	0
2006-06-01	0.13
2006-07-01	1.16
2006-08-01	0
2006-09-01	0.21
2006-10-01	1.78
2006-11-01	0
2006-12-01	0.27
2007-01-01	0
2007-02-01	0.53
2007-03-01	0.04
2007-04-01	0.09
2007-05-01	0
2007-06-01	0
2007-07-01	1.21
2007-08-01	1.17
2007-09-01	1.85
2007-10-01	0
2007-11-01	1.88
2007-12-01	0.75
2008-01-01	1.67
2008-02-01	0.23
2008-03-01	0.08
2008-04-01	0
2008-05-01	0.38
2008-06-01	0
2008-07-01	1.14
2008-08-01	0.34
2008-09-01	0.33
2008-10-01	0.01
2008-11-01	1.86
2008-12-01	0.28
2009-01-01	0.02
2009-02-01	1.34
2009-03-01	0.08
2009-04-01	0.35
2009-05-01	0
2009-06-01	0.01
2009-07-01	0.68
2009-08-01	0.88
2009-09-01	0.41
2009-10-01	0
2009-11-01	0.06
2009-12-01	0.67
2010-01-01	2.25
2010-02-01	1.77
2010-03-01	0.93
2010-04-01	0.37
2010-05-01	0.01
2010-06-01	0
2010-07-01	0.1
2010-08-01	0.1
2010-09-01	0
2010-10-01	1.11
2010-11-01	0.17
2010-12-01	5.6
2011-01-01	0
2011-02-01	1.16
2011-03-01	0.5
2011-04-01	0.08
2011-05-01	0.02
2011-06-01	0
2011-07-01	0.35
2011-08-01	0.12
2011-09-01	0.86
2011-10-01	0.39
2011-11-01	0.43
2011-12-01	0.03
2012-01-01	0
2012-02-01	0
2012-03-01	0
2012-04-01	0
2012-05-01	0.02
2012-06-01	0
2012-07-01	2.48
2012-08-01	4.23
2012-09-01	0.56
2012-10-01	0
2012-11-01	0
2012-12-01	0.05
2013-01-01	0.57
2013-02-01	0.21
2013-03-01	0.21
2013-04-01	0.03
2013-05-01	0.46
2013-06-01	0
2013-07-01	2.08
2013-08-01	2.35
2013-09-01	0.63
2013-10-01	0.2
2013-11-01	2.4
2013-12-01	0.01
2014-01-01	0
2014-02-01	0.75
2014-03-01	0.05
2014-04-01	0.82
2014-05-01	0.01
2014-06-01	0
2014-07-01	0.08
2014-08-01	2.31
2014-09-01	1.23
2014-10-01	0
2014-11-01	0.03
2014-12-01	0.99
2015-01-01	1.05
2015-02-01	0.44
2015-03-01	0.47
2015-04-01	0.21
2015-05-01	0.07
2015-06-01	0.13
2015-07-01	2.25
2015-08-01	0.82
2015-09-01	1.02
2015-10-01	1.14
2015-11-01	0.26
2015-12-01	0.24
2016-01-01	1.95
2016-02-01	0.21
2016-03-01	0.56
2016-04-01	1.59
2016-05-01	0.18
2016-06-01	0.08
2016-07-01	0.63
2016-08-01	1.6
2016-09-01	0.27
2016-10-01	0.17
2016-11-01	0.22
2016-12-01	2.19
2017-01-01	2.61
2017-02-01	1.48
2017-03-01	0.04
2017-04-01	0
2017-05-01	0.03
2017-06-01	0
2017-07-01	0.43
2017-08-01	0.52
2017-09-01	1.92
2017-10-01	0
2017-11-01	0
2017-12-01	0
2018-01-01	1.74
2018-02-01	0.12
2018-03-01	1.3
2018-04-01	0.03
2018-05-01	0.61
2018-06-01	0
2018-07-01	2.42

## Sheet: Mitchell Caverns
YEAR(S)	JAN		FEB		MAR		APR		MAY		JUN		JUL		AUG		SEP		OCT		NOV		DEC		ANN
1958	-----	z	-----	z	1.78	j	1.82		0.58		0		0.04		1.19		1.3		0.8		0.8		0		6.53	c
1959	0.25		1.02		0		0		0		0		0.48		0.87		0.19		0.71		0.47		3.57		7.56
1960	1.93		0.73		0.28		0		0		0		0.57		0		0.73		0.3		1.28		0.75		6.57
1961	0.67		0.15		1.09		0.82		0		0		0.14		0.43		1.37		0.11		0.19		0.79		5.76
1962	0.14		1.08		0.57		0		0.64		0		0.03		0		0.04		0.26		0		0.29		3.05
1963	0.34		3.36		0.26		0.27		0		0.06		0		1.25		2.02		1.45		0.35		0		9.36
1964	0.25		0		0.88		0.5		0.47		0.07		1.18		0.1		0		0.01		1.09		0		4.55
1965	0.62		0.34		1.11		2.94		0.07		0		0.19		0.78		0		0.16		3.24		3.01		12.46
1966	0.06		0.62		0.68		0		0.08		0		0.74		0.24		0.09		0.5		1.35		0.97		5.33
1967	0.4		0		0		0.48		0		0		1.05		1.05		0.73		0		1.11		1.55		6.37
1968	0		0.47		1.19		0.45		0.21		0		2.03		0.94		0		0.05		0.56		0.28		6.18
1969	2.55		3.19		0.17		0.33		1.38		0.36		0.03		1.64		1.45		0.1		0.43		0		11.63
1970	0.29		1.73		0.69		0.28		0		0.31		0.03		1.27		0		0.07		1.33		1.06		7.06
1971	0		0.16		0.05		0.05		0.76		0		0.31		2.87		0		0.2		0.32		0.99		5.71
1972	0		0		0		0		0		0.67		0		0.79		0.45		0.86		1.13		0.95		4.85
1973	1.25		1.11		2.32		0.51		0.64		0.26		0		0.75		0		0		0.82		0.12		7.78
1974	2.29		0.06		0.86		0.17		0		0		0.44		1.09		0.06		0.97		0.03		1.08		7.05
1975	0		0.27		1.03		1.35		0.02		0		0.02		0.43		0.24		0.66		0.09		0.1		4.21
1976	0		5.94		0.41		1.39		0.02		0.03		0.26		0		2.42		1.23		0		0.2		11.9
1977	1.5		0		0.61		0.1		0.79		0.03		0		6.14		0.51		0.87		0.58		1.11		12.24
1978	3.87		4.12		3.07		0.51		0.71		0		0.28		0		0.11		1.09		1.75		1.74		17.25
1979	2.16	g	1.64		3.88		0		0		0		3.52		8.39		0		0.29		0		0.2		17.92	a
1980	5.8		8.08		2.23		0.82		0.51		-----	z	0.31		0		1.6		1.07		0		0		20.42	a
1981	1.18		1.19		3.44		0.23		1.1		0.01		0.26		0.6		1.73		0.92		0.82		0.09		11.57
1982	1.28		0.5		2.5		0.68		0.57		0		0.75		2.47		3.42		0.07		1.34		1.73		15.31
1983	1.07		1.89		6.24		0.65		0	a	0		0.39		8.89		0.11	b	1.99		0.05		1.57		22.85
1984	0		0.01		0		0.15		0		0		9.58		4.45	a	0.02		0		1.19	a	4.68		20.08
1985	1.68		0.47		0.08		0.35	a	0	b	0		0	b	0		1.93		0.03		2.56	a	0.08	a	7.18
1986	0.63		0.61		2.46		0.05		0.02		0		0.25		1.18		0.07	a	0.81	b	0.47		2.78		9.33
1987	1.16		1.17		1.09		0.21		0.71		0.21		1.43		0.05		0.09		3.1		2.41		1.65		13.28
1988	1.63		0.63	a	0		2.77		0		0.21		0.09	a	7.87		0		0		0.45	a	0.55	a	14.2
1989	2.45	a	0.32		0.42	c	0		0.09		0		0.34		0.68		0.04		0.03		0		0.17		4.54
1990	1		0.44		0	a	1.21		0.12		1.22		1.97		0.7		1.63		1.9		0		1.5		11.69
1991	-----	z	1.8		2.84	d	0		0		0.36		0.98		1.24		2.19		0.54		0	c	1.58		11.53	a
1992	1.32		5.23		9.56		0		0.42		-----	z	0.28		0		0.12		0.52		0		2.16		19.61	a
1993	5.57		4.04		1.04		0		0.22		0.53		0		1.63	a	0		0.62		0.88		0.4		14.93
1994	0.22		0.56		0.95		0.33		0.11		0		0.04		0.15	a	0.18		0.82		1		2.34		6.7
1995	5.75		0.83		2.39		0.5		0.29		0.06		0.01		0.2		1.06		0		0		0.27		11.36
1996	0.2		1		0.59		0		0.33		0		1.14		0.37		0.02		0.93	b	0.86		0.13		5.57
1997	1.5		0.58		0		0.13		0		0.03		0.72		0.14		4.7		0.02		0.59		0.56		8.97
1998	0.86		6.79		2.99		0.64		0.31		0		0.67		1.26		3.01		0.38		0.08		0.35		17.34
1999	0.34		0.2		0.03		3.11		0.33		0.33		2.8		0.51		1.14		0		0	b	0		8.79
2000	0.16		2.42		1.1		0.05		0		0		0		1.02		0.03	d	2.08		0.01		0.02		6.89
2001	2.03		3.34	a	1.31		0.6		0		0		1.11		0.09	c	0		0.03		0.64		0.33		9.48
2002	0.2		0		0.11		0.05		0		0		1.17		0		0.19		0.58		1.24		0.76		4.3
2003	0.32		3.26		0.87	a	1.99		0.11		0		0.08		1.59		0.38		0		0.95		1.24		10.79
2004	0.26		3.56		0.74		2.23		0		0		0.35		3.27		0.01		3.03		1.29		5.18		19.92
2005	5.24	a	6.74		0.91	a	-----	z	-----	z	0		2.02	a	1.71		0.39		2.11		0		0		19.12	b
2006	0.05		0		0.28	d	0		0		0		1.72		0.13	a	0.74		1.48		0		0.32		4.72
2007	0.3		0.28	a	0.02		0		0		0		1.92		0.49		3.09	a	0		0		2.28		8.38
2008	1.46	b	0.61		0.03		0		0.13		0		0.53		0.26	c	0.15		0.02		2.11		2.7	a	8
2009	0.04		1.1	b	0		0.12		0.2		0		0		0.03		0.03		0		0		1.44		2.96
2010	3.94		2.77		1.07		0.3		0		0		0		0.01		0		1.24		0.01		7.09	d	16.43
2011	0	a	0.64	a	0.81	g	0.11	d
YEAR(S)	1958	1959	1960	1961	1962	1963	1964	1965	1966	1967	1968	1969	1970	1971	1972	1973	1974	1975	1976	1977	1978	1979	1980	1981	1982	1983	1984	1985	1986	1987	1988	1989	1990	1991	1992	1993	1994	1995	1996	1997	1998	1999	2000	2001	2002	2003	2004	2005	2006
JAN	-----							0.62							0							2.16							0.63							5.57							0.16
FEB	-----							0.34							0							1.64							0.61							4.04							2.42
MAR	1.78							1.11							0							3.88							2.46							1.04							1.1
APR	1.82							2.94							0							0							0.05							0							0.05
MAY	0.58							0.07							0							0							0.02							0.22							0
JUN	0							0							0.67							0							0							0.53							0
JUL	0.04							0.19							0							3.52							0.25							0							0
AUG	1.19							0.78							0.79							8.39							1.18							1.63							1.02
SEP	1.3							0							0.45							0							0.07							0							0.03
OCT	0.8							0.16							0.86							0.29							0.81							0.62							2.08
NOV	0.8							3.24							1.13							0							0.47							0.88							0.01
DEC	0							3.01							0.95							0.2							2.78							0.4							0.02
	0.25							0.06							1.25							5.8							1.16							0.22							2.03
	1.02							0.62							1.11							8.08							1.17							0.56							3.34
	0							0.68							2.32							2.23							1.09							0.95							1.31
	0							0							0.51							0.82							0.21							0.33							0.6
	0							0.08							0.64							0.51							0.71							0.11							0
	0							0							0.26							-----							0.21							0							0
	0.48							0.74							0							0.31							1.43							0.04							1.11
	0.87							0.24							0.75							0							0.05							0.15							0.09
	0.19							0.09							0							1.6							0.09							0.18							0
	0.71							0.5							0							1.07							3.1							0.82							0.03
	0.47							1.35							0.82							0							2.41							1							0.64
	3.57							0.97							0.12							0							1.65							2.34							0.33
	1.93							0.4							2.29							1.18							1.63							5.75							0.2
	0.73							0							0.06							1.19							0.63							0.83							0
	0.28							0							0.86							3.44							0							2.39							0.11
	0							0.48							0.17							0.23							2.77							0.5							0.05
	0							0							0							1.1							0							0.29							0
	0							0							0							0.01							0.21							0.06							0
	0.57							1.05							0.44							0.26							0.09							0.01							1.17
	0							1.05							1.09							0.6							7.87							0.2							0
	0.73							0.73							0.06							1.73							0							1.06							0.19
	0.3							0							0.97							0.92							0							0							0.58
	1.28							1.11							0.03							0.82							0.45							0							1.24
	0.75							1.55							1.08							0.09							0.55							0.27							0.76
	0.67							0							0							1.28							2.45							0.2							0.32
	0.15							0.47							0.27							0.5							0.32							1							3.26
	1.09							1.19							1.03							2.5							0.42							0.59							0.87
	0.82							0.45							1.35							0.68							0							0							1.99
	0							0.21							0.02							0.57							0.09							0.33							0.11
	0							0							0							0							0							0							0
	0.14							2.03							0.02							0.75							0.34							1.14							0.08
	0.43							0.94							0.43							2.47							0.68							0.37							1.59
	1.37							0							0.24							3.42							0.04							0.02							0.38
	0.11							0.05							0.66							0.07							0.03							0.93							0
	0.19							0.56							0.09							1.34							0							0.86							0.95
	0.79							0.28							0.1							1.73							0.17							0.13							1.24
	0.14							2.55							0							1.07							1							1.5							0.26
	1.08							3.19							5.94							1.89							0.44							0.58							3.56
	0.57							0.17							0.41							6.24							0							0							0.74
	0							0.33							1.39							0.65							1.21							0.13							2.23
	0.64							1.38							0.02							0							0.12							0							0
	0							0.36							0.03							0							1.22							0.03							0
	0.03							0.03							0.26							0.39							1.97							0.72							0.35
	0							1.64							0							8.89							0.7							0.14							3.27
	0.04							1.45							2.42							0.11							1.63							4.7							0.01
	0.26							0.1							1.23							1.99							1.9							0.02							3.03
	0							0.43							0							0.05							0							0.59							1.29
	0.29							0							0.2							1.57							1.5							0.56							5.18
	0.34							0.29							1.5							0							-----							0.86							5.24
	3.36							1.73							0							0.01							1.8							6.79							6.74
	0.26							0.69							0.61							0							2.84							2.99							0.91
	0.27							0.28							0.1							0.15							0							0.64							-----
	0							0							0.79							0							0							0.31							-----
	0.06							0.31							0.03							0							0.36							0							0
	0							0.03							0							9.58							0.98							0.67							2.02
	1.25							1.27							6.14							4.45							1.24							1.26							1.71
	2.02							0							0.51							0.02							2.19							3.01							0.39
	1.45							0.07							0.87							0							0.54							0.38							2.11
	0.35							1.33							0.58							1.19							0							0.08							0
	0							1.06							1.11							4.68							1.58							0.35							0
	0.25							0							3.87							1.68							1.32							0.34							0.05
	0							0.16							4.12							0.47							5.23							0.2							0
	0.88							0.05							3.07							0.08							9.56							0.03							0.28
	0.5							0.05							0.51							0.35							0							3.11							0
	0.47							0.76							0.71							0							0.42							0.33							0
	0.07							0							0							0							-----							0.33							0
	1.18							0.31							0.28							0							0.28							2.8							1.72
	0.1							2.87							0							0							0							0.51							0.13
	0							0							0.11							1.93							0.12							1.14							0.74
	0.01							0.2							1.09							0.03							0.52							0							1.48
	1.09							0.32							1.75							2.56							0							0							0
	0							0.99							1.74							0.08							2.16							0							0.32
[truncated: 5 more columns]

## Sheet: Mountain Pass
Mountain Pass
YEAR(S)	JAN		FEB		MAR		APR		MAY		JUN		JUL		AUG		SEP		OCT		NOV		DEC		ANN
1955	-----	z	0	r	0		0.2		0.56		0.35	f	3.36	c	4.06		0		0		0.62		0.16		8.96	c
1956	0.98		0		0		0.4		0.01		0		1.08		0		0		0.5		0		0		2.97
1957	0.92		0.45		0.46		0.63		1.06		0.05		0.13		1.82		0		1.72		0.67		0.2		8.11
1958	0.55		1.41		1.97		1.87		0.83		0		0.15		1.77		2.6		0.48		1.7		0		13.33
1959	0.18		1.35		0		0.07		0		0.02		1.67		0.39		0.23		1.92		0.27		1.86	a	7.96
1960	0.88		1.27		0.16		0.47		0		-----	z	-----	z	-----	z	-----	z	0	j	1.4		0.4	a	4.58	e
1961	1.15		0.04		0.52		0.2		0.03		0	r	-----	z	0.29		0		0.19		0.34		0.73		3.49	b
1962	0.95		1.33		0.82		0		0.11		0.03		0.1		0		-----	z	-----	z	0		0.33		3.67	b
1963	0.35		2.51		0.17		0.2		0		0.81		0		0.2		0.89		1.51		1.06		0		7.7
1964	0.44		0.15		0.89		0.3		0.61		0.12		0.85		1.39		0		0.01		2.25		0.2		7.21
1965	0.82		0.7		1		2.81		0.24		0		0.82		1.78		0		-----	z	-----	z	-----	z	8.17	c
1966	-----	z	-----	z	0.25	a	0		0		0		-----	z	-----	z	-----	z	0		0.02		2.35		2.62	e
1967	1.15		0		0.7		0.6		0		0		0.07		1.83		0.01		0		1.25		0.95	d	6.56
1968	0		0		0		0		0		0		3.63		2.6		0		0		0.8		0.01		7.04
1969	2.8		1.74		0.55		0.25		0		0.5		0.65		1.49		1.68		0.18		0.42		0.01		10.27
1970	0.13		0.78		0.46		0.03		0		0		1.76		3.15		0		0.02		0.6		0.19		7.12
1971	0		0.06		0.08		0.06		0.87		0		0.69		1.04		0		0.2		0.15		0.63		3.78
1972	0		0		0		0.16		0.01		1.61		0		1.41		0.53		0.31		2.08		1.52		7.63
1973	-----	z	-----	z	3.35		0		0.04		0		0		1.3		0.02		0		1.1		0.02		5.83	b
1974	1.67		0.03		0.28		0.2		0.01		0		0.66		0.98		0.72		3.48		0.44		0.95		9.42
1975	0.38		0.18		0.95		2.7		0		0		0.05		0.2		0	p	0.27		0.17		0		4.9	a
1976	0		1.84		0.28		0.19		0.45		0		0.22		0		3.43		0.28		0		0.06		6.75
1977	0.64		0		0.72		0		1.16		0.27		0.1		3.64		0.54		0.38		0.52		1.4		9.37
1978	2		1.79		2.27		1.01		0.56		0		0.27		0.67		0		0.16		2.18		2.25		13.16
1979	1.99		0.61		2.2		0		0.02		0		1.97		2.45		0		0.3		0.13		-----	z	9.67	a
1980	2.13		2.66		1.71		0.72		0.37		0.2		3.33		0		0.64		0.29		0		0		12.05
1981	0.71		0.76		1.24		0.03		1.34		-----	z	-----	z	-----	z	-----	z	0.64		0.82		0.08		5.62	d
1982	1.69	a	0.74		1.46		0.16	j	-----	z	-----	z	-----	z	2.32	g	-----	z	0.32		2.13		1.11		7.45	f
1983	0.78		1.73		2.73		0.13		0		-----	z	-----	z	-----	z	-----	z	-----	z	1.05	c	0.4	a	6.82	e
1984	0		0		0		0.22		0		0		5.9		1.89		0	g	0		1.44		2.15	b	11.6	a
1985	1.25		0.9		0.27		0.29		0		0		1.27	e	0		0.69		0.68		1.06		0.49	a	6.9
1986	0.51		0.68	b	1.67		0.21		0.07		0.21		0.5		1.47	c	0		0.42		0.7		2.02	b	8.46
1987	0.75	a	1.12		0.6	b	0.3	a	1.36		0.83		0.04		0.86	a	0.39	a	0.82	d	0.77	b	1.03	b	8.87
1988	0.98	a	0.3	b	0.04		2.49		0		0		0		2.88	a	0		0		0.6		0.4	a	7.69
1989	1.05		0.75	c	0.3		0		0.5		0		0.3		0.14	b	0		0.8		0		0.25		4.09
1990	1.26	a	0.64	a	0	a	0.2		0.28	b	2.98	a	1.98		0.45	b	2.76	d	0		0.09	b	0.03	a	10.67
1991	1.2	a	0.53		2.11	a	0		0		0.33		3.48	a	0.47		0.45		0.4	r	0.3	a	0.73		9.6	a
1992	0.73		2.75	c	4.94	b	0.14		0.22		0		0.33		3.97	b	0.1		0.86		0		2.21	e	16.25
1993	3.55	b	2.08	c	0.14	b	0		0.25	a	0.75	b	0		0.18		0		0.01	b	0.77	a	0.55	c	8.28
1994	0.06		0.3	d	0.85	b	0.34		0.31	b	0		0.07		0.43		0.49		0.27	a	1.07	e	1.68	c	5.87
1995	3.53	a	0.8	c	1.43	c	0.32	a	0.18		0.09		0		0.71	a	0.07		0		0		0.41		7.54
1996	0.76	a	1.42	a	1.06		0		0.32	b	0.02		0.94	b	0.49		1.14	a	0.51		1.09	c	0.36	a	8.11
1997	1.38	c	0.11		0		0		0		0		0.64	c	0.14	a	3.78	a	0		0.4	b	0.5		6.95
1998	0.6		5.1	g	2.4		0.75		1.33		0.17		0.85		0.11	b	1.2		0.4	a	0.51	c	0.06	d	8.38	a
1999	0.13	a	0.29	a	0.06		1.22	c	0.21	b	0		4.51		0.37	a	1.88	b	0		0		0		8.67
2000	0.23	c	3.81	f	0.4	b	0.57		0		0		0		3.69		0		1.18	c	0		0.01		6.08	a
2001	1.68	d	1.7	c	1.12		0.38	b	0		0		2.49	h	0.16	b	0		0.85	a	0.16	i	0.41	d	6.3	b
2002	0.04	b	0		0.26	c	0		0		0		1.04	l	0		0.23		0.59	b	0.15	d	0.47	j	1.27	b
2003	0.13		1.09		1.26	b	1.34		0.09		0		0.65		1.99		0.75		0		1.14		0.92	a	9.36
2004	0.23		2.17		0.62		1.59		0		0.01		0.59		0.14		2.7		2.09		1.94		2.2		14.28
2005	2.39		3.7		0.61		0.13		0		0		0.9		2.71		0.53		1.55		0		0.03		12.55
2006	0.13		0.39		1.13		1.14		0.16		-----	z	-----	z	-----	z	-----	z	1.62		0		0.25		4.82	d
2007	0		0		0.5	k	0.18		0	x	0	v	-----	z	-----	z	-----	z	-----	z	-----	z	-----	z	0.18	i
YEAR(S)	1955	1956	1957	1958	1959	1960	1961	1962	1963	1964	1965	1966	1967	1968	1969	1970	1971	1972	1973	1974	1975	1976	1977	1978	1979	1980	1981	1982	1983	1984	1985	1986	1987	1988	1989	1990	1991	1992	1993	1994	1995	1996	1997	1998	1999	2000	2001	2002	2003
JAN	-----							0.95							2.8							0							0.78							1.26							1.38
FEB	0							1.33							1.74							1.84							1.73							0.64							0.11
MAR	0							0.82							0.55							0.28							2.73							0							0
APR	0.2							0							0.25							0.19							0.13							0.2							0
MAY	0.56							0.11							0							0.45							0							0.28							0
JUN	0.35							0.03							0.5							0							-----							2.98							0
JUL	3.36							0.1							0.65							0.22							-----							1.98							0.64
AUG	4.06							0							1.49							0							-----							0.45							0.14
SEP	0							-----							1.68							3.43							-----							2.76							3.78
OCT	0							-----							0.18							0.28							-----							0							0
NOV	0.62							0							0.42							0							1.05							0.09							0.4
DEC	0.16							0.33							0.01							0.06							0.4							0.03							0.5
	0.98							0.35							0.13							0.64							0							1.2							0.6
	0							2.51							0.78							0							0							0.53							5.1
	0							0.17							0.46							0.72							0							2.11							2.4
	0.4							0.2							0.03							0							0.22							0							0.75
	0.01							0							0							1.16							0							0							1.33
	0							0.81							0							0.27							0							0.33							0.17
	1.08							0							1.76							0.1							5.9							3.48							0.85
	0							0.2							3.15							3.64							1.89							0.47							0.11
	0							0.89							0							0.54							0							0.45							1.2
	0.5							1.51							0.02							0.38							0							0.4							0.4
	0							1.06							0.6							0.52							1.44							0.3							0.51
	0							0							0.19							1.4							2.15							0.73							0.06
	0.92							0.44							0							2							1.25							0.73							0.13
	0.45							0.15							0.06							1.79							0.9							2.75							0.29
	0.46							0.89							0.08							2.27							0.27							4.94							0.06
	0.63							0.3							0.06							1.01							0.29							0.14							1.22
	1.06							0.61							0.87							0.56							0							0.22							0.21
	0.05							0.12							0							0							0							0							0
	0.13							0.85							0.69							0.27							1.27							0.33							4.51
	1.82							1.39							1.04							0.67							0							3.97							0.37
	0							0							0							0							0.69							0.1							1.88
	1.72							0.01							0.2							0.16							0.68							0.86							0
	0.67							2.25							0.15							2.18							1.06							0							0
	0.2							0.2							0.63							2.25							0.49							2.21							0
	0.55							0.82							0							1.99							0.51							3.55							0.23
	1.41							0.7							0							0.61							0.68							2.08							3.81
	1.97							1							0							2.2							1.67							0.14							0.4
	1.87							2.81							0.16							0							0.21							0							0.57
	0.83							0.24							0.01							0.02							0.07							0.25							0
	0							0							1.61							0							0.21							0.75							0
	0.15							0.82							0							1.97							0.5							0							0
	1.77							1.78							1.41							2.45							1.47							0.18							3.69
	2.6							0							0.53							0							0							0							0
	0.48							-----							0.31							0.3							0.42							0.01							1.18
	1.7							-----							2.08							0.13							0.7							0.77							0
	0							-----							1.52							-----							2.02							0.55							0.01
	0.18							-----							-----							2.13							0.75							0.06							1.68
	1.35							-----							-----							2.66							1.12							0.3							1.7
	0							0.25							3.35							1.71							0.6							0.85							1.12
	0.07							0							0							0.72							0.3							0.34							0.38
	0							0							0.04							0.37							1.36							0.31							0
	0.02							0							0							0.2							0.83							0							0
	1.67							-----							0							3.33							0.04							0.07							2.49
	0.39							-----							1.3							0							0.86							0.43							0.16
	0.23							-----							0.02							0.64							0.39							0.49							0
	1.92							0							0							0.29							0.82							0.27							0.85
	0.27							0.02							1.1							0							0.77							1.07							0.16
	1.86							2.35							0.02							0							1.03							1.68							0.41
	0.88							1.15							1.67							0.71							0.98							3.53							0.04
	1.27							0							0.03							0.76							0.3							0.8							0
	0.16							0.7							0.28							1.24							0.04							1.43							0.26
	0.47							0.6							0.2							0.03							2.49							0.32							0
	0							0							0.01							1.34							0							0.18							0
	-----							0							0							-----							0							0.09							0
	-----							0.07							0.66							-----							0							0							1.04
	-----							1.83							0.98							-----							2.88							0.71							0
	-----							0.01							0.72							-----							0							0.07							0.23
	0							0							3.48							0.64							0							0							0.59
	1.4							1.25							0.44							0.82							0.6							0							0.15
	0.4							0.95							0.95							0.08							0.4							0.41							0.47
	1.15							0							0.38							1.69							1.05							0.76							0.13
	0.04							0							0.18							0.74							0.75							1.42							1.09
	0.52							0							0.95							1.46							0.3							1.06							1.26
	0.2							0							2.7							0.16							0							0							1.34
	0.03							0							0							-----							0.5							0.32							0.09
	0							0							0							-----							0							0.02							0
	-----							3.63							0.05							-----							0.3							0.94							0.65
	0.29							2.6							0.2							2.32							0.14							0.49							1.99
	0							0							0							-----							0							1.14							0.75
	0.19							0							0.27							0.32							0.8							0.51							0
	0.34							0.8							0.17							2.13							0							1.09							1.14
	0.73							0.01							0							1.11							0.25							0.36							0.92
[truncated: 4 more columns]

## Sheet: Needles
Needles
YEAR(S)	JAN		FEB		MAR		APR		MAY		JUN		JUL		AUG		SEP		OCT		NOV		DEC		ANN
1940	-----	z	-----	z	0.28	i	0.1		0		0.05		0		0		0.99		0.19		0.22		2.94		4.49	c
1941	0.84		0.39		2.65		2.12		0		0		0.06		2.18		0.05		0.55		0.67		1.45		10.96
1942	0.18		0		0.27		0.17		0		0		0		1.23		0		0.17		0.03		0		2.05
1943	1.95		0.03		0.4		0.38		0		0		0.11		0.83		0.65		0.16		0		0.37		4.88
1944	0		1.78		0.23		0.05		0		0		0		0		0		0.14		0.87		0.48		3.55
1945	0.18		0.75		0.9		0		0		0		0		2.41		0.12		0.9		0		1.03		6.29
1946	0.19		0.01		0		0.01		0		0		1.14		0.17		1.05		0.59		1.21		0.27		4.64
1947	0		0		0		0		0.17		0		0		0.72		0		0.66		0.03		0.79		2.37
1948	0		0.12		0.05		0		0		0		0.1		0.08		0.05		0.41		0		0.72		1.53
1949	4.19		0.1		0		0.01		0.01		0		0.02		0.19		0.11		0.08		0.15		0.32		5.18
1950	0.04		0.01		0.3		0		0		0		0.4		0		0.48		0		0.03		0		1.26
1951	0.38		0		0		0.32		0.31		0		0.21		4.2		0.23		0.49		0.47		0.75		7.36
1952	0.58		0.07		1.02		1.07		0		0.09		0.97		0.18		0.45		0		0.5		0.89		5.82
1953	0		0.53		0.18		0.03		0		0		1.4		0.39		0		0		0.03		0		2.56
1954	1.12		0.05		1.69		0		0		0		0.64		0.15		0.07		0		0		0.03		3.75
1955	1.92		0		0		0.09		0		0		1.19		1.58		0		0		0.1		0		4.88
1956	0.59		0		0		0.02		0		0		0.81		0.13		0		0		0		0		1.55
1957	0.32		0.14		0.02		0.25		0.16		0.05		0		1.08		0		1.37		0.46		0.16		4.01
1958	0.33		1.02		0.81		0.26		0.66		0		0		0.8		0.09		0.53		0		0		4.5
1959	0.2		0.19		0		0.02		0		0.01		0.19		2.09		0.31		1.1		0		2.07		6.18
1960	0.54		0.64		0		0		0.03		0		0.03		0.04		0.69		0		1.15		0		3.12
1961	0.14		0		0.07		0.02		0.12		0		0.04		0.55		0.02		0.4		0.02		0.17		1.55
1962	0.01		0.34		0		0		0		0.01		0.17		0.15		0.03		0.16		0		0.34		1.21
1963	0		0.65		0.04		0.01		0		0		0		0.36		1.04		1.65		0.64		0		4.39
1964	0		0		0.02		0.33		0		0		0.3		0.19		0.02		0.06		0.87		0.21		2
1965	0.18		0.42		1.57		2.81		0		0		0.12		0.05		0.11		0.15		1.72		2.45		9.58
1966	0.17		0.99		0.58		0		0		0.02		0.17		0.09		0.04		0.66		0.4		0.89		4.01
1967	0.19		0		0.01		0.32		0.01		0		0.2		0.1		0.77		0		0.52		0.71		2.83
1968	0		0.43		0.32		0		0		0.14		1.55		0.01		0		0		0.09		0.19		2.73
1969	0.59		0.17		0.04		0		0.17		0.02		0.09		0.14		1.99		0.04		0.25		0		3.5
1970	0.01		0.82		0.33		0.02		0		0		0.56		1.45		0.1		0.03		0.14		0.26		3.72
1971	0		0.08		0		0		0.34		0		0.01		2.8		0.1		0.31		0.04		0.6		4.28
1972	0		0		0		0		0		0.41		0.02		0.36		0.32		0.9		1.04		0.16		3.21
1973	0.12		0.82		1.3		0.06		0		0.08		0		0.24		0		0		0.36		0		2.98
1974	1.55		0		0.65		0		0		0		2.21		0.29		0.17		0.09		0.36		0.4		5.72
1975	0		0.21		0.49		0.08		0		0		0.01		0		1.6		0.11		0.08		0.19		2.77
1976	0		1.56		0		0.48		0		0		0.01		0.14		4.72		0.84		0.23		0.28		8.26
1977	0.25		0		0.26		0.06		0.21		0.01		0.12		1.52		0.37		0	r	0.03		0.11		2.94	a
1978	2.39		1.23		1.29		0.88		0.11		0		0.06		0		0		0.79		0.75		1.26		8.76
1979	1.09		0.23		1.34		0		0.03		0		1.38		0.66	a	0		0.07		0		0		4.8
1980	2.15		1.21		0.88		0.76		0.02		0.01		1.55		0		0.32		0.05		0		0.04		6.99
1981	0.04		0.22		0.92		0		0.18		0.01		0.11		0.28		0.68		0.63		0.44		0		3.51
1982	0.22	a	0.83		0.88		0.03		0.38		0		0.38	b	3.37	c	0.1	a	0.09		0.62		0.99	c	7.89
1983	0.16	a	0.91		1.89		0.19	a	0		0		0.04		3.33	b	0.54		1.14		0.07	c	0.42		8.69
1984	0		0		0		0.02	b	0		0		0.59		1.6		0.38		0		0.64		2.6		5.83
1985	1.23		0.16		0.33		0.09		0		0		0.12		0		0.44		0.26		1.22		0.14		3.99
1986	0.3		0.58		0.58		0.25		0		0	c	0.12	c	1.48	b	0.1	h	0.59	j	0.62	h	1.14	i	3.31	d
1987	0.2	j	0.04	h	0.02	i	0.02	j	0.02	h	0.07	h	0		0	j	0.26	b	0.65	b	1.53		0.1	j	2.44	h
1988	0.51		0.94		0.03		2.34		0		0.03		0.26		1.94		0.09		0.02		0.15		0		6.31
1989	1.07		0		0		0		0.02		0		0.07		0.2		0.04		0.3		0		0.09		1.79
1990	0.92		0.12		0.1		0.24		0.73		0		0.84		0.28		1.7		0.1		0.03		0		5.06
1991	1.35		0.34		2.12		0		0		0.1		0		0		0.54		0		0.4		0.87		5.72
1992	0.71	a	1.76		3.19		0.02		0.75		0		0		0.8		0.02		0.59		0		1.57		9.41
1993	3.64		2.54		0.43		0		0.09		0.01		0		0.16		0		0		0.34		0.01		7.22
1994	0.15		0.29		1.42		0		0.15		0		0.09		0.09		0		0.16		0.38		1.81		4.54
1995	2.34		0.23		0.44		0.35		0.13		0		0		0.19		0.03		0		0		0		3.71
1996	0.01		0.22		0.04		0		0.15		0		0.46		0.03		0.92		0.12		0.52		0.01		2.48
1997	0.53		0.1		0		0.05		0		0.06		0.04		0.33		1.61		0.1		0.32		0.29		3.43
1998	0.38		3.6		0.46		0.12		0.05		0		0.29		0.06		2.63		0.1		0.28		0		7.97
1999	0.02		0.44		0		0.49		0		0.01		0.77		0.13		0.43		0		0		0		2.29
2000	0		0.32		1.21		0		0		0.48		0		0.21		0.02		0.64		0		0		2.88
2001	1.59		0.99		1.21		0.15		0		0		0.12		0.29		0		0		0.09		0.22		4.66
2002	0.03		0		0.02		0.04		0		0		0.02		0		0.08		0.25		0.48		0		0.92
2003	0.3		1.97		0.81		0.17		0.01		0		0.02		0.58		0.27		0		0.37		0.06		4.56
2004	0		1.52		0.06		1.04		0		0		0		0.4		0.08		1.33		1.39		0.51		6.33
2005	1.84		2.38		0.15		0		0		0		0		0.67	b	0		0		0.03		0		5.07
2006	0		0		0.12		0.02		0		0.14		0.15		0		0.04		0.18		0		0.05		0.7
2007	0.17		0.02		0.05		0.06		0		0		0.02		0		0.25		0		0.73		0.31		1.61
2008	1.1		0.49		0.02		0		0		0		0.49		1.7	a	0.03		0		0.86		1.12		5.81
2009	0.06		0.93		0		0		0.01		0		0	a	0.4		0		0		0.1		0.76		2.26
2010	2.7		0.75		0.63		0		0		0.12		0		0.08		0.01		0.46		0		1.21		5.96
2011	0		0.72		0.08		0.09		0.45		0		0.17		0.04		1.1		0.39		0.31		0.29		3.64
2012	0		0.09		0.11		0.42		0		0		1.37		0.32		0.21		0.72		0		0.99		4.23
2013	0.46		0.08		0.25		0		0		0		0.18		2.84		0.26		0.03		0.91		0.01		5.02
2014	0		0.08		0		0.01		0		0		1.73		2.7		0.87		0.1		0		0.39		5.88
2015	0.67		0.45		0.79		0		0.04		0.21		1.07		0		0		0.69		0		0.08		4
2016	0.59		0.01		0.03		1.59		0.01		0		0		0		0		0		0.01		1.03		3.27
2017	0.96		0.95		0.06		0		0.18		0		0		0.16		0.26		0		0		0		2.57
2018	0.41		0.2		0.23		0		0		0		0.93	c
YEAR(S)	1940	1941	1942	1943	1944	1945	1946	1947	1948	1949	1950	1951	1952	1953	1954	1955	1956	1957	1958	1959	1960	1961	1962	1963	1964	1965	1966	1967	1968	1969	1970	1971	1972	1973	1974	1975	1976	1977	1978	1979	1980	1981	1982	1983	1984	1985	1986	1987	1988
JAN	-----							0							1.12							0.14							0							0							0.22
FEB	-----							0							0.05							0							0.43							0.21							0.83
MAR	0.28							0							1.69							0.07							0.32							0.49							0.88
APR	0.1							0							0							0.02							0							0.08							0.03
MAY	0							0.17							0							0.12							0							0							0.38
JUN	0.05							0							0							0							0.14							0							0
JUL	0							0							0.64							0.04							1.55							0.01							0.38
AUG	0							0.72							0.15							0.55							0.01							0							3.37
SEP	0.99							0							0.07							0.02							0							1.6							0.1
OCT	0.19							0.66							0							0.4							0							0.11							0.09
NOV	0.22							0.03							0							0.02							0.09							0.08							0.62
DEC	2.94							0.79							0.03							0.17							0.19							0.19							0.99
	0.84							0							1.92							0.01							0.59							0							0.16
	0.39							0.12							0							0.34							0.17							1.56							0.91
	2.65							0.05							0							0							0.04							0							1.89
	2.12							0							0.09							0							0							0.48							0.19
	0							0							0							0							0.17							0							0
	0							0							0							0.01							0.02							0							0
	0.06							0.1							1.19							0.17							0.09							0.01							0.04
	2.18							0.08							1.58							0.15							0.14							0.14							3.33
	0.05							0.05							0							0.03							1.99							4.72							0.54
	0.55							0.41							0							0.16							0.04							0.84							1.14
	0.67							0							0.1							0							0.25							0.23							0.07
	1.45							0.72							0							0.34							0							0.28							0.42
	0.18							4.19							0.59							0							0.01							0.25							0
	0							0.1							0							0.65							0.82							0							0
	0.27							0							0							0.04							0.33							0.26							0
	0.17							0.01							0.02							0.01							0.02							0.06							0.02
	0							0.01							0							0							0							0.21							0
	0							0							0							0							0							0.01							0
	0							0.02							0.81							0							0.56							0.12							0.59
	1.23							0.19							0.13							0.36							1.45							1.52							1.6
	0							0.11							0							1.04							0.1							0.37							0.38
	0.17							0.08							0							1.65							0.03							0							0
	0.03							0.15							0							0.64							0.14							0.03							0.64
	0							0.32							0							0							0.26							0.11							2.6
	1.95							0.04							0.32							0							0							2.39							1.23
	0.03							0.01							0.14							0							0.08							1.23							0.16
	0.4							0.3							0.02							0.02							0							1.29							0.33
	0.38							0							0.25							0.33							0							0.88							0.09
	0							0							0.16							0							0.34							0.11							0
	0							0							0.05							0							0							0							0
	0.11							0.4							0							0.3							0.01							0.06							0.12
	0.83							0							1.08							0.19							2.8							0							0
	0.65							0.48							0							0.02							0.1							0							0.44
	0.16							0							1.37							0.06							0.31							0.79							0.26
	0							0.03							0.46							0.87							0.04							0.75							1.22
	0.37							0							0.16							0.21							0.6							1.26							0.14
	0							0.38							0.33							0.18							0							1.09							0.3
	1.78							0							1.02							0.42							0							0.23							0.58
	0.23							0							0.81							1.57							0							1.34							0.58
	0.05							0.32							0.26							2.81							0							0							0.25
	0							0.31							0.66							0							0							0.03							0
	0							0							0							0							0.41							0							0
	0							0.21							0							0.12							0.02							1.38							0.12
	0							4.2							0.8							0.05							0.36							0.66							1.48
	0							0.23							0.09							0.11							0.32							0							0.1
	0.14							0.49							0.53							0.15							0.9							0.07							0.59
	0.87							0.47							0							1.72							1.04							0							0.62
	0.48							0.75							0							2.45							0.16							0							1.14
	0.18							0.58							0.2							0.17							0.12							2.15							0.2
	0.75							0.07							0.19							0.99							0.82							1.21							0.04
	0.9							1.02							0							0.58							1.3							0.88							0.02
	0							1.07							0.02							0							0.06							0.76							0.02
	0							0							0							0							0							0.02							0.02
	0							0.09							0.01							0.02							0.08							0.01							0.07
	0							0.97							0.19							0.17							0							1.55							0
	2.41							0.18							2.09							0.09							0.24							0							0
	0.12							0.45							0.31							0.04							0							0.32							0.26
	0.9							0							1.1							0.66							0							0.05							0.65
	0							0.5							0							0.4							0.36							0							1.53
	1.03							0.89							2.07							0.89							0							0.04							0.1
	0.19							0							0.54							0.19							1.55							0.04							0.51
	0.01							0.53							0.64							0							0							0.22							0.94
	0							0.18							0							0.01							0.65							0.92							0.03
	0.01							0.03							0							0.32							0							0							2.34
	0							0							0.03							0.01							0							0.18							0
	0							0							0							0							0							0.01							0.03
	1.14							1.4							0.03							0.2							2.21							0.11							0.26
	0.17							0.39							0.04							0.1							0.29							0.28							1.94
	1.05							0							0.69							0.77							0.17							0.68							0.09
	0.59							0							0							0							0.09							0.63							0.02
	1.21							0.03							1.15							0.52							0.36							0.44							0.15
	0.27							0							0							0.71							0.4							0							0
[truncated: 30 more columns]

## Sheet: Yucca Grove
Yucca Grove
YEAR(S)	JAN		FEB		MAR		APR		MAY		JUN		JUL		AUG		SEP		OCT		NOV		DEC		ANN
1931	-----	z	-----	z	-----	z	-----	z	-----	z	-----	z	-----	z	-----	z	0		0		0.11		1.8		1.91	h
1932	0.67		0.78		0		0		0		0.16		0.03		0		0.6		0.3		0		1.49		4.03
1933	0	a	0		0		0		0		0.09		0.2		0.18		0		0.35		0.02		0.9		1.74
1934	0		0.23		0		0		0		0		0.7		0.6		0		0.65		0.65		1.1		3.93
1935	1		2.09		1		0.45		0.13		0		0.05		-----	z	0		0		0		0.65		5.37	a
1936	0		3.02		0.61		0.27		0		0		-----	z	0.45		0		0.15		0		4.68		9.18	a
1937	2.76		0.55		0.72		-----	z	-----	z	-----	z	-----	z	-----	z	-----	z	0		0		1.05		5.08	f
1938	0.45		1.51		3.75		0.2		0.45		1.1		0.07		0.29		1.18		0.55		0		2.15	a	11.7
1939	1.93		0.56	a	1.25		1.06		0.01		0		0.15		1.57		2.22		0		1.03		0.3		10.08
1940	1.51		1.96		0.45		1.65		0.06		0		0		0		1.68		0.22		0.2		1.85		9.58
1941	1.1		1.63		2.88		2.33		0		0		-----	z	2.99		0		1.45		0.51		-----	z	12.89	b
1942	-----	z	-----	z	-----	z	-----	z	-----	z	-----	z	-----	z	-----	z	-----	z	-----	z	-----	z	-----	z	0	l
1943	-----	z	1.15		1.03		0.73		-----	z	-----	z	-----	z	-----	z	-----	z	-----	z	0		1.56		4.47	g
1944	0.55		1.66		0.2		0.12		0.32		0		0		0		0		0		2.9		0.33		6.08
1945	0.37		1.52		1.95		0.21		0		0		0.38		3.57		0.09		1.62		0		1.29		11
1946	0.22		0.49		0.58		0.74		0		0		1.22		0.15		0.79		1.2		1.85		1.03		8.27
1947	0.06		0.06		0.23		-----	z	0.22		0.07		0.08		0		0		1.22		0		2.33		4.27	a
1948	0		0.47		0.62		0.11		0		0		0.26	b	0.47		0		0.35		0		1.13		3.41
1949	1.76		1.03		0.54		0.12		0.23		0.03	c	0		0.3		0		0.22		0.69	c	1.31		6.23
1950	0.25		0.38		0.44		0.45		0		0		1.25		0		0.59		0		0.18		0		3.54
1951	1.68	g	0.06		0.35		0.91		0.64		0		0.78		0.34		0.81		0.41		0.12		2.94		7.36	a
1952	1.93		0.06		3.27		1.34		0		0		0.27		0		1.62		0		1.08		1.74		11.31
1953	0.15		0.04		0.1		0.62		0.16		0		0		0.61	d	0	d	0.24		0.11		0.09		2.12
1954	1.27		0.71		1.97		0		0		0		1.35		0		0.15		0.03		0.55	p	-----	z	5.48	b
YEAR(S)	1931	1932	1933	1934	1935	1936	1937	1938	1939	1940	1941	1942	1943	1944	1945	1946	1947	1948	1949	1950	1951	1952	1953	1954
JAN	-----	0.67	0	0	1	0	2.76	0.45	1.93	1.51	1.1	-----	-----	0.55	0.37	0.22	0.06	0	1.76	0.25	1.68	1.93	0.15	1.27
FEB	-----	0.78	0	0.23	2.09	3.02	0.55	1.51	0.56	1.96	1.63	-----	1.15	1.66	1.52	0.49	0.06	0.47	1.03	0.38	0.06	0.06	0.04	0.71
MAR	-----	0	0	0	1	0.61	0.72	3.75	1.25	0.45	2.88	-----	1.03	0.2	1.95	0.58	0.23	0.62	0.54	0.44	0.35	3.27	0.1	1.97
APR	-----	0	0	0	0.45	0.27	-----	0.2	1.06	1.65	2.33	-----	0.73	0.12	0.21	0.74	-----	0.11	0.12	0.45	0.91	1.34	0.62	0
MAY	-----	0	0	0	0.13	0	-----	0.45	0.01	0.06	0	-----	-----	0.32	0	0	0.22	0	0.23	0	0.64	0	0.16	0
JUN	-----	0.16	0.09	0	0	0	-----	1.1	0	0	0	-----	-----	0	0	0	0.07	0	0.03	0	0	0	0	0
JUL	-----	0.03	0.2	0.7	0.05	-----	-----	0.07	0.15	0	-----	-----	-----	0	0.38	1.22	0.08	0.26	0	1.25	0.78	0.27	0	1.35
AUG	-----	0	0.18	0.6	-----	0.45	-----	0.29	1.57	0	2.99	-----	-----	0	3.57	0.15	0	0.47	0.3	0	0.34	0	0.61	0
SEP	0	0.6	0	0	0	0	-----	1.18	2.22	1.68	0	-----	-----	0	0.09	0.79	0	0	0	0.59	0.81	1.62	0	0.15
OCT	0	0.3	0.35	0.65	0	0.15	0	0.55	0	0.22	1.45	-----	-----	0	1.62	1.2	1.22	0.35	0.22	0	0.41	0	0.24	0.03
NOV	0.11	0	0.02	0.65	0	0	0	0	1.03	0.2	0.51	-----	0	2.9	0	1.85	0	0	0.69	0.18	0.12	1.08	0.11	0.55
DEC	1.8	1.49	0.9	1.1	0.65	4.68	1.05	2.15	0.3	1.85	-----	-----	1.56	0.33	1.29	1.03	2.33	1.13	1.31	0	2.94	1.74	0.09	-----
